# Supplementary material for: Design and development of sulfonylurea derivatives as zinc metalloenzyme modulators
Source: Royal Society of Chemistry journal article supplement (doi:10.1039/c5ra27341b), 2016-01-01
Supplement: c5ra27341b1.pdf [file c5ra27341b1.pdf]

## Electronic Supplementary Information

# Design and Development of Sulfonylurea Derivatives as Zinc Metalloenzyme Modulators

Murtuza Hadianawala, Bhaskar Datta\*

Department of Chemistry, Indian Institute of Technology Gandhinagar, VGEC Complex

Chandkheda, Ahmedabad 382424 India.

**\* Corresponding author**

\* Bhaskar Datta, Department of Chemistry, Indian Institute of Technology Gandhinagar,

VGEC Complex Chandkheda, Ahmedabad 382424 India

Telephone: 079-3245-9902; Fax: 079-2397-2622; E-mail: [bdatta@iitgn.ac.in](mailto:bdatta@iitgn.ac.in)

## Materials

All the reagents were obtained from Sigma-Aldrich, Alfa-Aesar and Merck Chemicals. Solvents were obtained from Merck Chemicals and Rankem and were used without further purification. All reactions were performed under an inert atmosphere of dry nitrogen.  $^1\text{H}$  NMR spectra were recorded on a 500 MHz Bruker Instrument. Mass spectra were measured by LC-MS on a Waters SYNAPT-G2S-S using electrospray ionization technique. All compounds were purified by using normal column chromatography technique and were characterized by NMR and LC/MS.

## Synthetic Procedure

**N-((4-phenylbutyl)carbamoyl)methanesulfonamide (1):** Methanesulfonyl chloride (0.2 mL, 2.6 mmol) was treated with pyridine (0.25 mL, 3.4 mmol) and allowed to stir for 5 min at 0 °C. The resultant solution was transferred to a mixture of sodium cyanate (0.2g, 2.9 mmol) in acetonitrile (5 mL) and allowed to stir for about 5 min at 0 °C. To the resultant mixture phenylbutyl amine (0.5 mL, 3.3 mmol) was added and reaction mixture was gradually brought to room temperature and then further stirred for 30 min at room temperature. The resulting reaction mixture was poured on crushed ice and acidified with dil. HCl (pH 5-6). Aqueous layer was extracted with ethyl acetate three times and combined extract was washed with brine and dried over anhydrous  $\text{Na}_2\text{SO}_4$ . Solvent was evaporated under vacuum and resulting residue was further purified by column chromatography to afford a white coloured title compound **1** (60 mg, 18%).

$^1\text{H}$  NMR ( $\text{CDCl}_3$ , 500 MHz):  $\delta$  8.42 (brs, 1H), 7.29-7.26 (m, 2H), 7.19-7.15 (m, 3H), 6.35 (brs, 1H), 3.27 (q, 2H,  $J = 6.2$  Hz), 3.15 (s, 3H), 2.64 (t, 2H,  $J = 7.4$  Hz), 1.68-1.62 (m, 2H), 1.59-1.54 (m, 2H).

MS (ESI): 271.10 [M+H]<sup>+</sup>.

**N-((4-phenylbutyl)carbamoyl)ethanesulfonamide (2):** The title compound was synthesized as a white solid (87 mg, 14%) by treatment of phenylbutyl amine (0.5 mL, 3.3 mmol) and ethanesulfonyl chloride (0.2 mL, 2.2 mmol) using the detailed procedure of compound 1.

<sup>1</sup>H NMR (CDCl<sub>3</sub>, 500 MHz): δ 7.29-7.28 (m, 2H), 7.20-7.15 (m, 3H), 6.99 (brs, 1H), 6.48 (brs, 1H), 3.29-3.21 (m, 4H), 2.64 (t, 2H, *J* = 7.4 Hz), 1.68-1.64 (m, 2H), 1.59-1.57 (m, 2H), 1.42 (t, 3H, *J* = 7.5 Hz).

MS (ESI): 285.12 [M+H]<sup>+</sup>, 307.10 [M+Na]<sup>+</sup>.

**N-((4-phenylbutyl)carbamoyl)propane-1-sulfonamide (3):** The title compounds was synthesized as a white solid (100 mg, 16%) by treatment of phenylbutyl amine (0.5 mL, 3.3 mmol) and propanesulfonyl chloride (0.25 mL, 2.2 mmol) using the detailed procedure of compound 1.

<sup>1</sup>H NMR (CDCl<sub>3</sub>, 500 MHz): δ 7.57 (brs, 1H), 7.29-7.28 (m, 2H), 7.20-7.15 (m, 3H), 6.45 (brs, 1H), 3.29-3.25 (m, 2H), 3.18 (t, 2H, *J* = 7.8 Hz), 2.63 (t, 2H, *J* = 7.3 Hz), 1.90-1.85 (m, 2H), 1.67-1.62 (m, 2H), 1.59-1.55 (m, 2H), 1.06 (t, 3H, *J* = 7.5 Hz).

MS (ESI): 299.17 [M+H]<sup>+</sup>, 321.15 [M+Na]<sup>+</sup>.

**N-((4-phenylbutyl)carbamoyl)propane-2-sulfonamide (4):** The title compound was synthesized as a white solid (95 mg, 15%) by treatment of phenylbutyl amine (0.5 mL, 3.3 mmol) and isopropane sulfonyl chloride (0.25 mL, 2.2 mmol) using the detailed procedure of compound 1.

<sup>1</sup>H NMR (CDCl<sub>3</sub>, 500 MHz): δ 8.09 (brs, 1H), 7.29-7.26 (m, 2H), 7.20-7.15 (m, 3H), 6.61 (brs, 1H), 3.39-3.33 (m, 1H), 3.28-3.24 (m, 2H), 2.62 (t, 2H, *J* = 7.3 Hz), 1.67-1.61 (m, 2H), 1.58-1.52 (m, 2H), 1.40 (d, 6H, *J* = 6.9 Hz).

MS (ESI): 299.13 [M+H]<sup>+</sup>, 321.12 [M+Na]<sup>+</sup>.

**N-((4-phenylbutyl)carbamoyl)cyclohexanesulfonamide (5):** The title compound was synthesized as a white solid (89 mg, 12 %) by treatment of phenylbutyl amine (0.5 mL, 3.3 mmol) and cyclohexylsulfonyl chloride (0.3 mL, 2.2 mmol) using the detailed procedure of compound **1**.

<sup>1</sup>H NMR(CDCl<sub>3</sub>, 500 MHz): δ 7.67 (brs, 1H), 7.29-7.27 (m, 2H), 7.20-7.15 (m, 3H), 6.58 (s, 1H), 3.28-3.24 (m, 2H), 2.63 (t, 2H, *J* = 7.4 Hz), 2.20-2.17 (m, 2H), 1.91-1.88 (m, 2H), 1.72-1.62 (m, 7H) 1.59-1.49 (m, 4H).

MS (ESI): 339.20 [M+H]<sup>+</sup>, 361.19 [M+Na]<sup>+</sup>.

**A typical procedure for the synthesis of aromatic sulfonylurea derivatives.**

**4-methyl-N-((4-phenylbutyl)carbamoyl)benzenesulfonamide (6):** *p*-tosyl chloride (0.5 g, 2.6 mmol) was treated with pyridine (0.4 mL, 5.0 mmol) and allow to stir for 5 min. The resultant solution was transferred to a mixture of sodium cyanate (0.25 g, 3.9 mmol) in acetonitrile (5 mL) and allowed to stir for about 4 hour at room temperature. To the resultant mixture phenylbutylamine (0.6 mL, 3.8 mmol) were added and stir for about 1 hr at room temperature. The resulting reaction mixture was poured on crushed ice and acidified with dil HCl (pH 5-6). Aqueous layer was extracted with ethyl acetate three times and combined extract was washed with brine and dried over anhydrous Na<sub>2</sub>SO<sub>4</sub>. Solvent was evaporated under vacuum and resulting residue was further purified by column chromatography to afford a white colored title compound **6** (485 mg, 54%).

<sup>1</sup>H NMR(DMSO-d<sub>6</sub>, 500 MHz) : δ 10.45 (brs, 1H), 7.76 (d, 2H, *J* = 8.2 Hz), 7.37 (d, 2H, *J* = 8.0 Hz), 7.25 (t, 2H, *J* = 7.4 Hz), 7.17-7.12 (m, 3H), 6.45 (brs, 1H), 2.96 (q, 2H, *J* = 6.5 Hz), 2.55 – 2.50 (m, 2H), 2.37 (s, 3H), 1.46-1.40 (m, 2H), 1.36-1.31 (m, 2H).

MS (ESI): 347.14 [M+H]<sup>+</sup>, 369.12 [M+Na]<sup>+</sup>.

**4-chloro-N-((4-phenylbutyl)carbamoyl)benzenesulfonamide (7):** The title compound was synthesized as a white solid (600 mg, 57%) by treatment of phenylbutylamine (0.7

mL, 4.4 mmol) and *p*-chlorophenylsulfonyl chloride (0.6 g, 2.9 mmol) using the procedure detailed of compound **6**.

<sup>1</sup>H NMR (CDCl<sub>3</sub>, 500 MHz) : δ 7.78 (d, 2H, *J* = 8.7 Hz), 7.44 (d, 2H, *J* = 8.7 Hz), 7.29 (t, 2H, *J* = 7.4 Hz), 7.20 (t, 1H, *J* = 7.4 Hz), 7.14 (d, 2H, *J* = 7.2 Hz), 6.49 (brs, 1H), 3.24 (q, 2H, *J* = 6.1 Hz), 2.60 (t, 2H, *J* = 7.2 Hz), 1.59-1.58(m, 2H), 1.53-1.52 (m, 2H).

MS (ESI): 366.97 [M+H]<sup>+</sup>, 368.97 [M+2], 388.95 [M+Na]<sup>+</sup>.

**4-methoxy-N-((4-phenylbutyl)carbamoyl)benzenesulfonamide (8):** The title compound was synthesized as a white solid (535 mg, 55%) by treatment of phenylbutylamine (0.6 mL, 3.8 mmol) and *p*-methoxyphenylsulfonyl chloride (0.55 g, 2.7 mmol) using the procedure detailed of compound **6**.

<sup>1</sup>H NMR (CDCl<sub>3</sub>, 500 MHz) : δ 7.78 (d, 2H, *J* = 8.7 Hz), 7.28 (t, 2H, *J* = 7.4 Hz), 7.19(t, 1H, *J* = 7.4 Hz), 7.14 (d, 2H, *J* = 7.2 Hz), 6.93 (d, 2H, *J* = 8.7 Hz), 6.53 (brs, 1H), 3.84 (s, 3H), 3.24 (q, 2H, *J* = 6.1 Hz), 2.60 (t, 2H, *J* = 7.2 Hz), 1.62-1.50(m, 4H)

.MS (ESI): 363.02 [M+H]<sup>+</sup>, 385.00 [M+Na]<sup>+</sup>.

**4-nitro-N-((4-phenylbutyl)carbamoyl)benzenesulfonamide (9):** The title compound was synthesized as a white solid (385 mg, 38%) by treatment of phenylbutylamine (0.6 mL, 3.8 mmol) and *p*-nitrophenylsulfonyl chloride (0.6 mL, 2.7 mmol) using the procedure detailed of compound **6**.

<sup>1</sup>H NMR (CDCl<sub>3</sub>, 500 MHz) : δ 8.30 (d, 2H, *J* = 8.5 Hz), 8.05 (d, 2H, *J* = 8.7 Hz), 7.28 (t, 2H, *J* = 7.4 Hz), 7.20 (t, 1H, *J* = 7.3 Hz), 7.14 (d, 2H, *J* = 7.2 Hz), 6.49 (brs, 1H), 3.25 (q, 2H, *J* = 6.1 Hz), 2.61 (t, 2H, *J* = 7.1 Hz), 1.62-1.52 (m, 4H).

MS (ESI): 378.10 [M+H]<sup>+</sup>, 400.09 [M+Na]<sup>+</sup>.

**N-((4-phenylbutyl)carbamoyl)benzenesulfonamide (10):** The title compound was synthesized as a white solid (535 mg, 52%) by treatment of phenylbutylamine (0.6 mL, 3.8 mmol) and phenylsulfonyl chloride (0.6 mL, 2.7 mmol) using the procedure detailed

of compound **6**.

$^1\text{H}$  NMR ( $\text{CDCl}_3$ , 500 MHz):  $\delta$  7.85 (d, 2H,  $J = 7.5$  Hz), 7.59 (t, 1H,  $J = 7.4$  Hz), 7.45 (t, 2H,  $J = 7.6$  Hz), 7.29-7.26 (m, 2H), 7.19 (t, 1H,  $J = 7.2$  Hz), 7.14 (d, 2H,  $J = 7.2$  Hz), 6.58 (brs, 1H), 3.25 (q, 2H,  $J = 6.5$  Hz), 2.61 (t, 2H,  $J = 7.0$  Hz), 1.59-1.53 (m, 4H).

MS (ESI): 332.12  $[\text{M}+\text{H}]^+$ , 355.10  $[\text{M}+\text{Na}]^+$ .

**N-(benzo[d]thiazol-2-ylcarbamoyl)-4-methylbenzenesulfonamide (11):** The title compound was synthesized as a white solid (370 mg, 41%) by treatment of 2-amino benzothiazole (0.6 g, 4 mmol) and *p*-tosyl chloride (0.5 g, 2.6 mmol) using the procedure detailed of compound **6**.

$^1\text{H}$  NMR ( $\text{DMSO-d}_6$ , 500 MHz) :  $\delta$  10.30 (brs, 1H), 7.67 (d, 1H,  $J = 7.6$  Hz), 7.62 (d, 2H,  $J = 7.3$  Hz), 7.42-7.40 (m, 1H), 7.19 (t, 1H,  $J = 7.6$  Hz), 7.14 (d, 2H,  $J = 7.6$  Hz), 7.02 (t, 1H,  $J = 7.5$  Hz), 2.25 (s, 3H).

MS (ESI): 348.16  $[\text{M}+\text{H}]^+$ , 370.14  $[\text{M}+\text{Na}]^+$ .

**4-methyl-N-(pyrazin-2-ylcarbamoyl)benzenesulfonamide (12) :** The title compound was synthesized as a white solid (340 mg, 45%) by treatment of 2-aminopyrazine (0.38 g, 4 mmol) and *p*-tosyl chloride (0.5 g, 2.6 mmol) using the procedure detailed of compound **6**.

$^1\text{H}$  NMR ( $\text{DMSO-d}_6$ , 500 MHz) :  $\delta$  11.14 (brs, 1H), 9.46 (s, 1H), 8.90 (s, 1H), 8.32 (d, 2H,  $J = 3.6$  Hz), 7.87 (d, 2H,  $J = 8.1$  Hz), 7.44 (d, 2H,  $J = 8.0$ Hz), 2.40 (s, 3H).

MS (ESI): 293.05  $[\text{M}+\text{H}]^+$ , 316.03  $[\text{M}+\text{Na}]^+$ .

**4-methyl-N-(phenylcarbamoyl)benzenesulfonamide (13):** The title compound was synthesized as a white solid (440 mg, 59%) by treatment of aniline (0.4 mL, 4.4 mmol) and *p*-tosyl chloride (0.5 g, 2.6 mmol) using the procedure detailed of compound **6**.

$^1\text{H}$  NMR( $\text{CDCl}_3$ , 500 MHz) :  $\delta$  8.45 (s, 1H), 8.28 (brs, 1H), 7.82 (d, 2H,  $J = 8.3$  Hz), 7.38 (d, 2H,  $J = 7.8$  Hz), 7.33-7.30 (m, 4H), 7.13 (t, 1H,  $J = 7.3$  Hz), 2.42 (s, 3H).

MS (ESI): 291.12 [M+H]<sup>+</sup>, 313.11 [M+Na]<sup>+</sup>

**4-methyl-N-(propylcarbamoyl)benzenesulfonamide (14):** The title compound was synthesized as a white solid (350 mg, 53%) by treatment of propylamine (0.3 mL, 4 mmol) and *p*-tosyl chloride (0.5 g, 2.6 mmol) using the procedure detailed of compound 6.

<sup>1</sup>H NMR (CDCl<sub>3</sub>, 500 MHz) : δ 7.76 (d, 2H, *J* = 8.3 Hz), 7.41 (brs, 1H), 7.33 (d, 2H, *J* = 8.0 Hz), 6.57 (brs, 1H), 3.18 (q, 2H, *J* = 6.9 Hz), 2.44 (s, 3H), 1.53-1.49 (m, 2H), 0.88 (t, 3H, *J* = 7.4 Hz).

MS (ESI): 257.09 [M+H]<sup>+</sup>, 279.07 [M+Na]<sup>+</sup>.

**N-(isobutylcarbamoyl)-4-methylbenzenesulfonamide (15):** The title compound was synthesized as a white solid (365 mg, 52%) by treatment of isobutylamine (0.4 mL, 4 mmol) and *p*-tosyl chloride (0.5 g, 2.6 mmol) using the procedure detailed of compound 6.

<sup>1</sup>H NMR (CDCl<sub>3</sub>, 500 MHz) : δ 7.88 (brs, 1H), 7.76 (d, 2H, *J* = 8.3 Hz), 7.32 (d, 2H, *J* = 8.1 Hz), 6.61 (brs, 1H), 3.04 (t, 2H, *J* = 6.3 Hz), 2.43 (s, 3H), 1.76-1.71 (m, 1H), 0.86 (d, 6H, *J* = 6.7 Hz).

MS (ESI): 271.15 [M+H]<sup>+</sup>, 293.14 [M+Na]<sup>+</sup>.

**N-(cyclohexylcarbamoyl)-4-methylbenzenesulfonamide (16):** The title compound was synthesized as a white solid (285 mg, 37 %) by treatment of cyclohexylamine (0.45 mL, 4 mmol) and *tosyl* chloride (0.5 g, 2.6 mmol) using the procedure detailed of compound 6.

<sup>1</sup>H NMR (DMSO-d<sub>6</sub>, 500 MHz) : δ 10.26 (brs, 1H), 7.76 (d, 2H, *J* = 8.2 Hz), 7.38 (d, 2H, *J* = 7.9 Hz), 6.30 (brs, 1H), 2.38 (s, 3H), 1.65-1.56 (m, 4H), 1.49-1.47 (m, 1H), 1.22-1.06 (m, 6H).

MS (ESI): 297.13 [M+H]<sup>+</sup>, 319.12 [M+Na]<sup>+</sup>.

**4-methyl-N-(phenethylcarbamoyl)benzenesulfonamide (17):** The title compound was

synthesized as a white solid (490 mg, 59%) by treatment of phenylethylamine (0.5 mL, 4 mmol) and *tosyl* chloride (0.5 g, 2.6 mmol) using the procedure detailed of compound **6**.

<sup>1</sup>H NMR (DMSO-d<sub>6</sub>, 500 MHz) : δ 10.52 (brs, 1H), 7.74 (d, 2H, *J* = 8.2 Hz), 7.39 (d, 2H, *J* = 8.1 Hz), 7.26 (t, 2H, *J* = 7.3 Hz), 7.19 (t, 1H, *J* = 7.3 Hz), 7.12 (d, 2H, *J* = 7.2 Hz), 6.42 (s, 1H), 3.18 (q, 2H, *J* = 6.7 Hz), 2.64 (t, 2H, *J* = 7.2 Hz), 2.39 (s, 3H).

MS (ESI): 319.09 [M+H]<sup>+</sup>, 341.07 [M+Na]<sup>+</sup>.

**N-tosylpiperidine-1-carboxamide (18):** The title compound was synthesized as a white solid (400 mg, 55%) by treatment of piperidine (0.4 mL, 4 mmol) and *tosyl* chloride (0.5 g, 2.6 mmol) using the procedure detailed of compound **6**.

<sup>1</sup>H NMR (DMSO-d<sub>6</sub>, 500 MHz) : δ 11.17 (brs, 1H), 10.87 (brs, 1H), 7.97 (d, 2H, *J* = 8.3 Hz), 7.33 (d, 2H, *J* = 8.3 Hz), 3.43-3.38 (m, 4H), 2.43 (s, 3H), 1.66-1.65 (m, 2H), 1.60-1.59 (m, 4H).

MS (ESI): 283.12 [M+H]<sup>+</sup>, 305.10 [M+Na]<sup>+</sup>.

### **Biological Assay for HDAC**

Assays were carried out in black, low binding NUNC 96-well plates. The ability of sulfonylurea derivatives to inhibit/activate HDAC-1 activity (% inhibition at 10 μM and 100 μM) was determined using an HDAC1 Inhibitor Screening Assay Kit (catalogue no. 10011564, Cayman Chemical) according to the manufacturer's instructions. Stock solutions of 10 mM of all compounds were prepared in DMSO and then diluted to require concentration using supplied assay buffer. Briefly, to a series of supplied reaction buffer solutions (140 μL, 25 mM Tris-HCl, pH 8.0, 137 mM NaCl, 2.7 mM KCl and 1 mM MgCl<sub>2</sub>) with HDAC-1 enzyme (10 μL) various concentrations of the test compound solutions (final between 10 uM and 100 μM) were added. The reactions were initiated by adding 10 μL of supplied substrate (Acetylated flourometric substrate) and then incubated



for 30 min at 37 °C. This was followed by addition of HDAC developer (40 µL) to each well and again incubated for 15 min at room temperature. Florescence were then read at an excitation wavelength of 350 nm and an emission wavelength of 450 nm. The intensity of this fluorescence is directly proportional to the amount of product formed after deacetylation of the fluorescent substrate in presence of HDAC-1. Percentage activation was calculated by comparison of test compounds with 100% initial activity value (no inhibitor or negative control). Blank wells containing no inhibitor or protein were subtracted from all wells. Assay contained each inhibitor in triplicate and values were reported as mean of triplicate.

### **Biological Assay for hCA II**

Human Carbonic Anhydrase II was purchased from Sigma Aldrich. Assays were carried out in clear Costar 96-well plates using previously described procedure.<sup>5</sup> Each well contained 45 µL buffer (50 mM Tris-SO<sub>4</sub>, pH = 8.0), 15 µL hCAII (200 nM), 15 µL inhibitor (10 µM), and 75 µL p-nitrophenyl acetate (500 µM) for a total volume of 150 µL. The enzyme and inhibitor were incubated in solution at 30 °C for 10 min followed by addition of the p-nitrophenyl acetate. Absorbance at 405 nm was recorded immediately thereafter for 20 min at regular interval of 10 sec initially for 5 min and then at an interval of 30 sec for remaining 15 minutes. The intensity of this absorbance is directly proportional to the amount of product (p-nitrophenolate ion) formed after hydrolysis of the p-nitrophenyl acetate in presence of hCA II. Percentage inhibition was calculated by comparison of test compounds with 100% initial activity value (no inhibitor or negative control). Blank wells containing no inhibitor or protein were subtracted from all wells. Assay contained each inhibitor in triplicate and values were reported as mean ± standard deviation.

### **FRET based Assay**

Assays were carried out in clear Costar 96-well plates. Each well contained 105  $\mu\text{L}$  buffer (50 mM Tris-SO<sub>4</sub>, pH = 8.0), 15  $\mu\text{L}$  hCAII (250 nM), 15  $\mu\text{L}$  dansylsulfonamide (25  $\mu\text{M}$ ) and 15  $\mu\text{L}$  inhibitor (10  $\mu\text{M}$ ) for a total volume of 150  $\mu\text{L}$ . The enzyme and dansylsulfonamide were incubated in solution at 30 °C for 10 min and their fluorescence at 470 nm were recorded using excitation wavelength of 280 nm. Acetazolamide or inhibitors were added and again fluorescence were recorded at 470 nm using excitation wavelength 280 nm for 20 min at regular interval of 2 minutes. Decrease in fluorescence was directly proportional to the displacement of dansylsulfonamide from the active site of hCA II. Percentage FRET observed was calculated by considering 100% FRET for the well without inhibitor (positive control). Blank wells (negative control) containing only buffer and hCA II were subtracted from all wells. Assay contained each inhibitor in triplicate and values were reported as mean from three different experiment.

### **Molecular Docking**

Atomic coordinates of histone deacetylase 2 (HDAC-2) and human carbonic anhydrase II (hCA II) were retrieved from Protein Data Bank (PDB) (entry 4LXZ and 4E3D). Initial coordinates of both HDAC-2 and hCA II were further modified using protein preparation wizard of Glide software (Schrodinger, LLC, New York, NY, USA). Proteins were minimized by applying OPLS- 2005 force field using standard parameters as included in the Glide. After refinement and minimization of protein a 10 Å grid was generated around the respective ligands by using receptor grid generation tool of Glide and applying standard parameters of Glide (Schrodinger, LLC, New York, NY, USA). All the compounds were built using Molecule Builder tool of Maestro (Schrodinger, LLC, New York, NY, USA). The built compounds were further prepared using LigPrep tool of Maestro software (Schrodinger,

LLC, New York, NY, USA). In LigPrep all the possible ionization states at pH 7.0 +/- 2.0, all possible tautomers, stereoisomer (unless stereochemistry is known or specified) were generated for each compound and finally minimized using OPLS-2005 force field. Energy minimized conformations of compounds were subjected to Glide XP docking using standard protocol of GLIDE (Schrodinger, LLC, New York, NY, USA) and results were analyzed using Glide XP Visualizer tool.

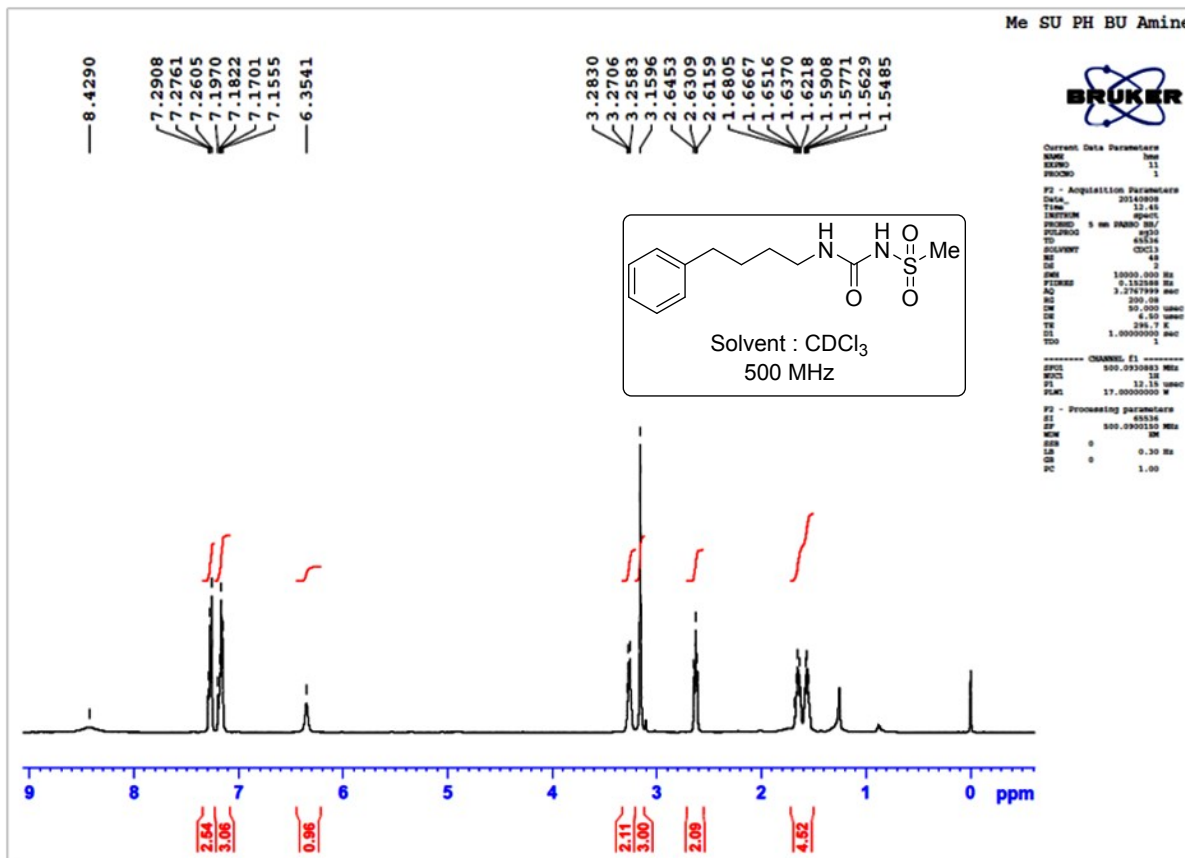

<sup>1</sup>H NMR of compound 1

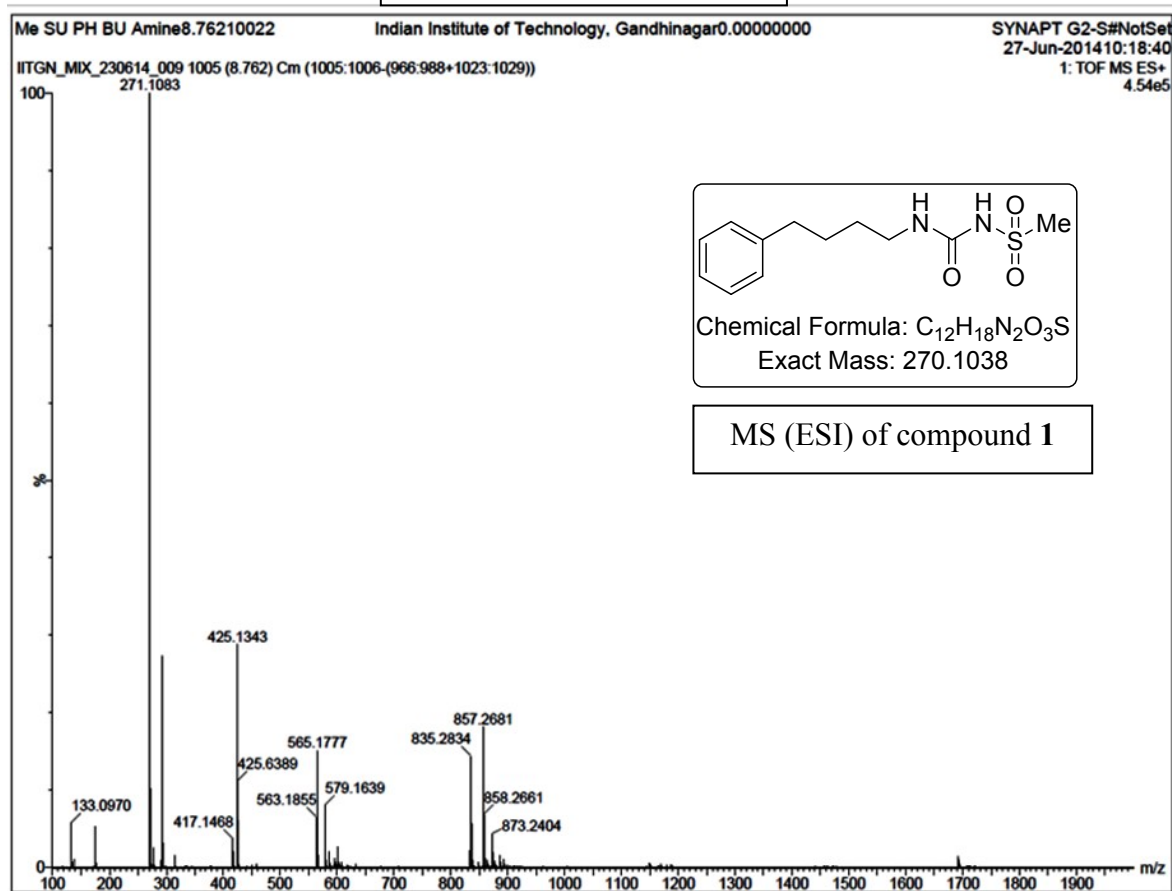

ethyl su ph b amine

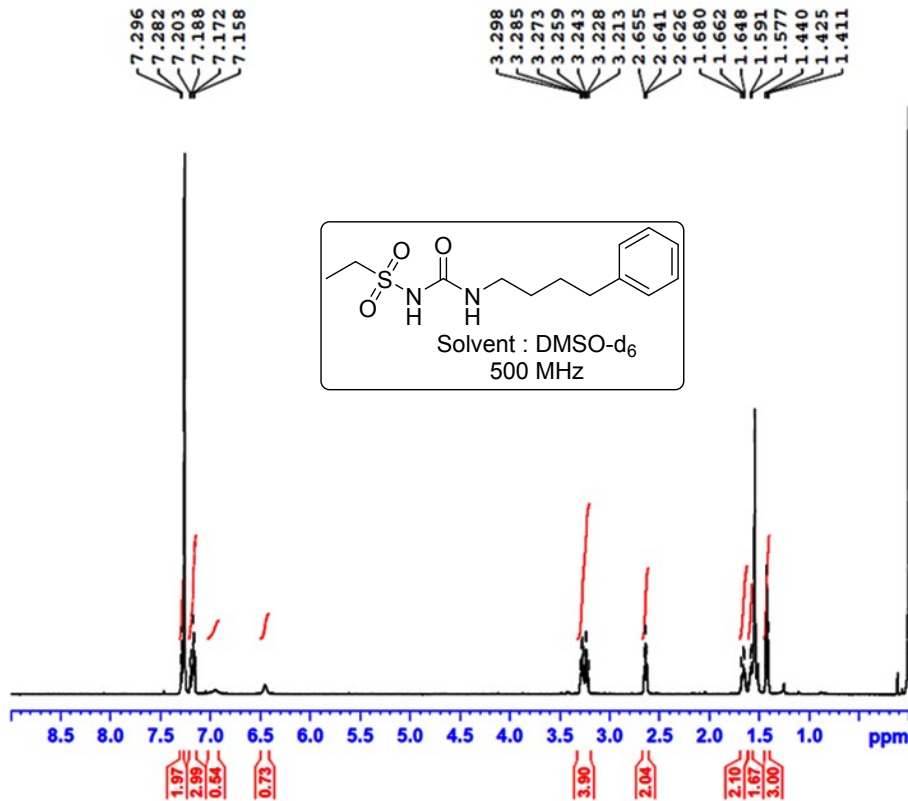

<sup>1</sup>H NMR of compound 2

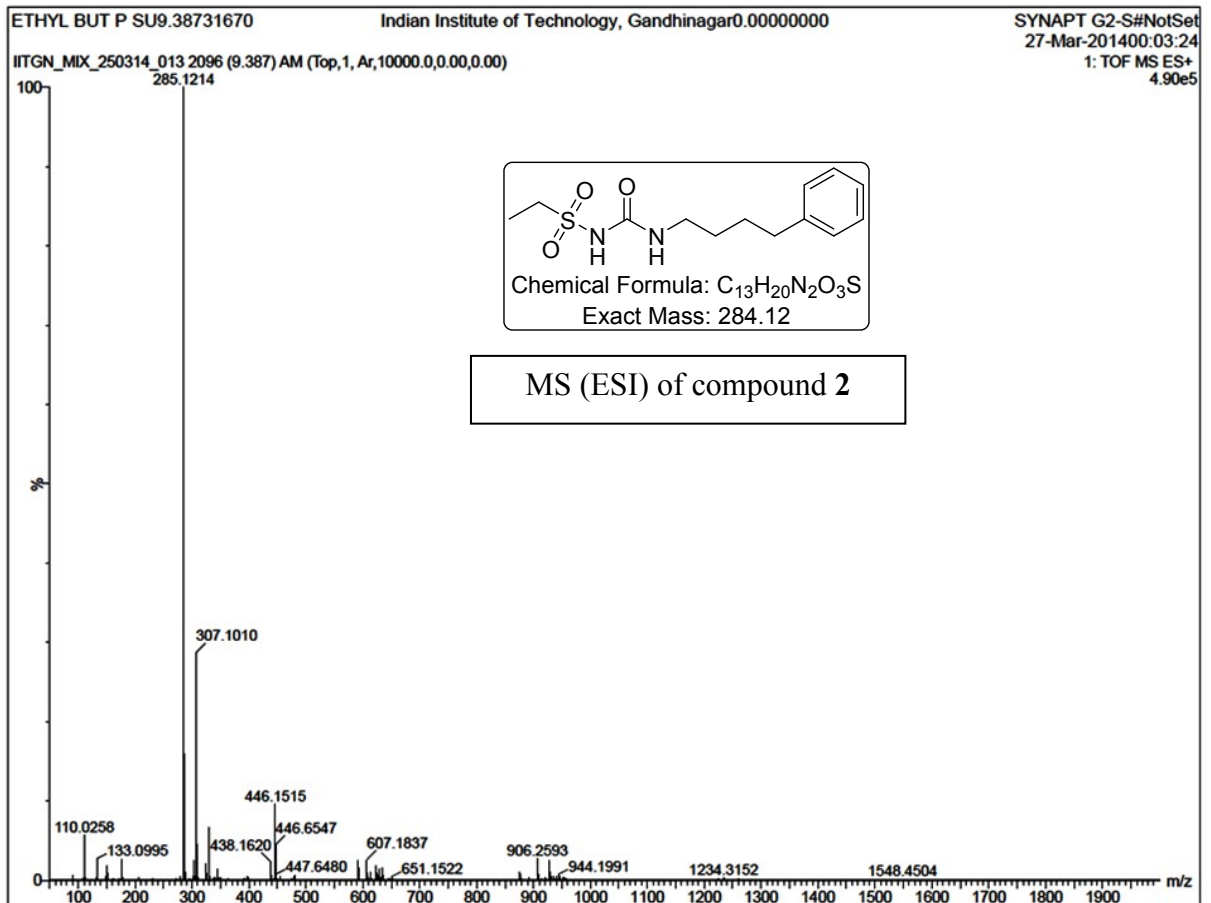

MS (ESI) of compound 2

propyl su ph bu ami

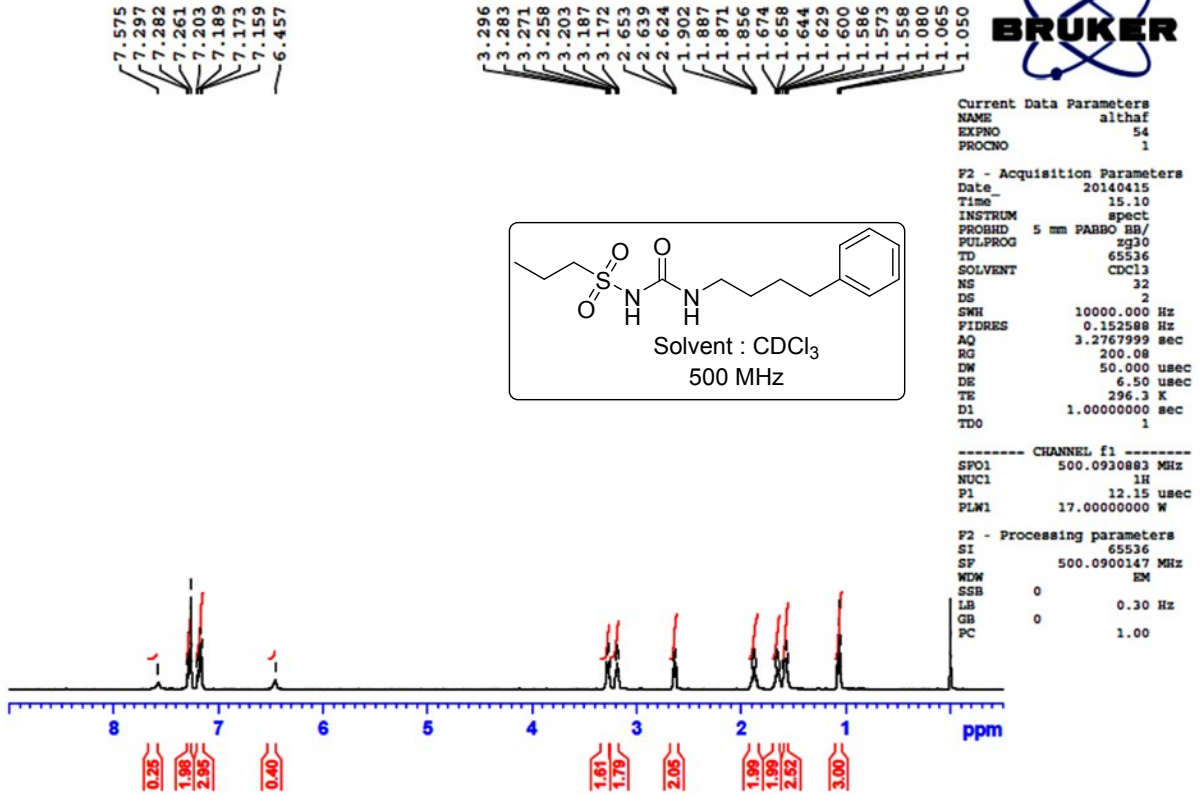

### <sup>1</sup>H NMR of compound 3

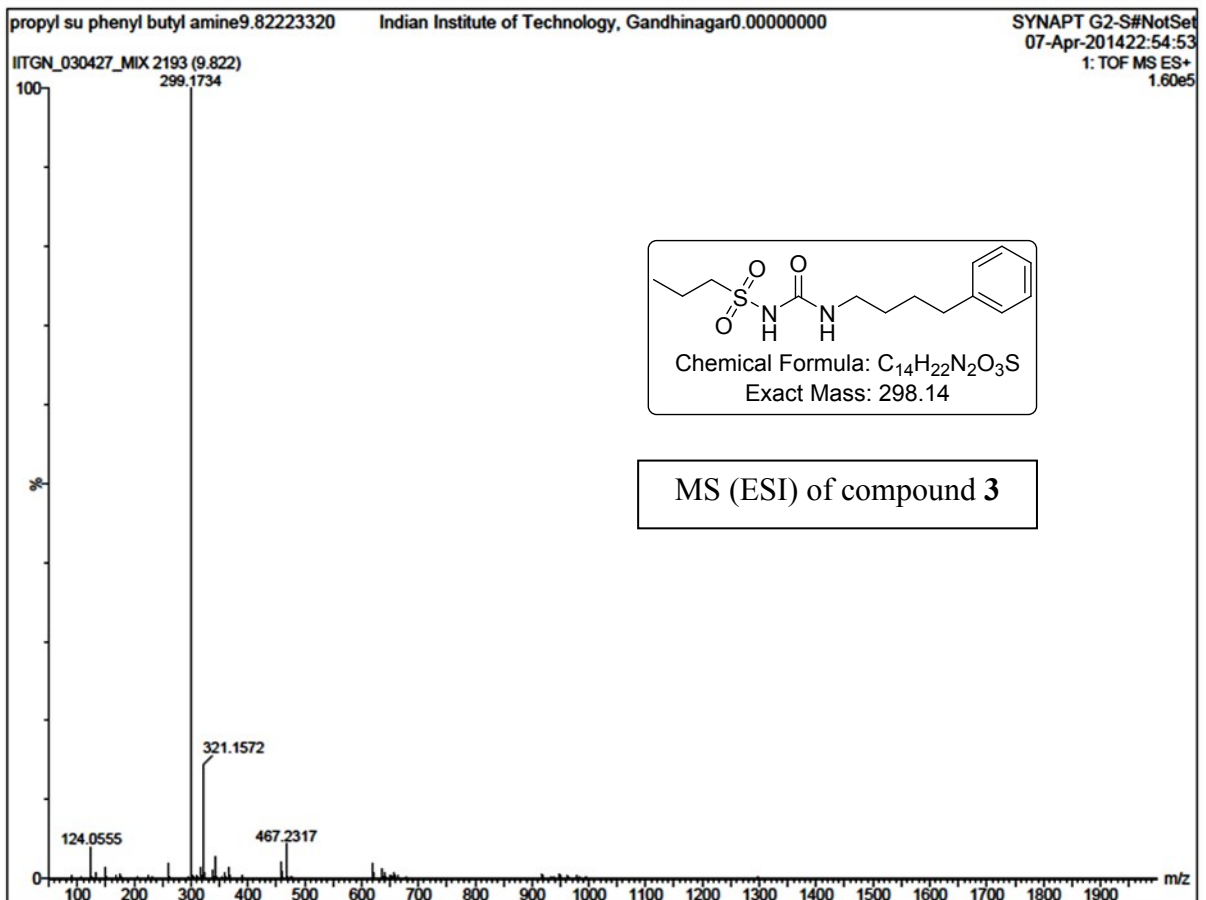

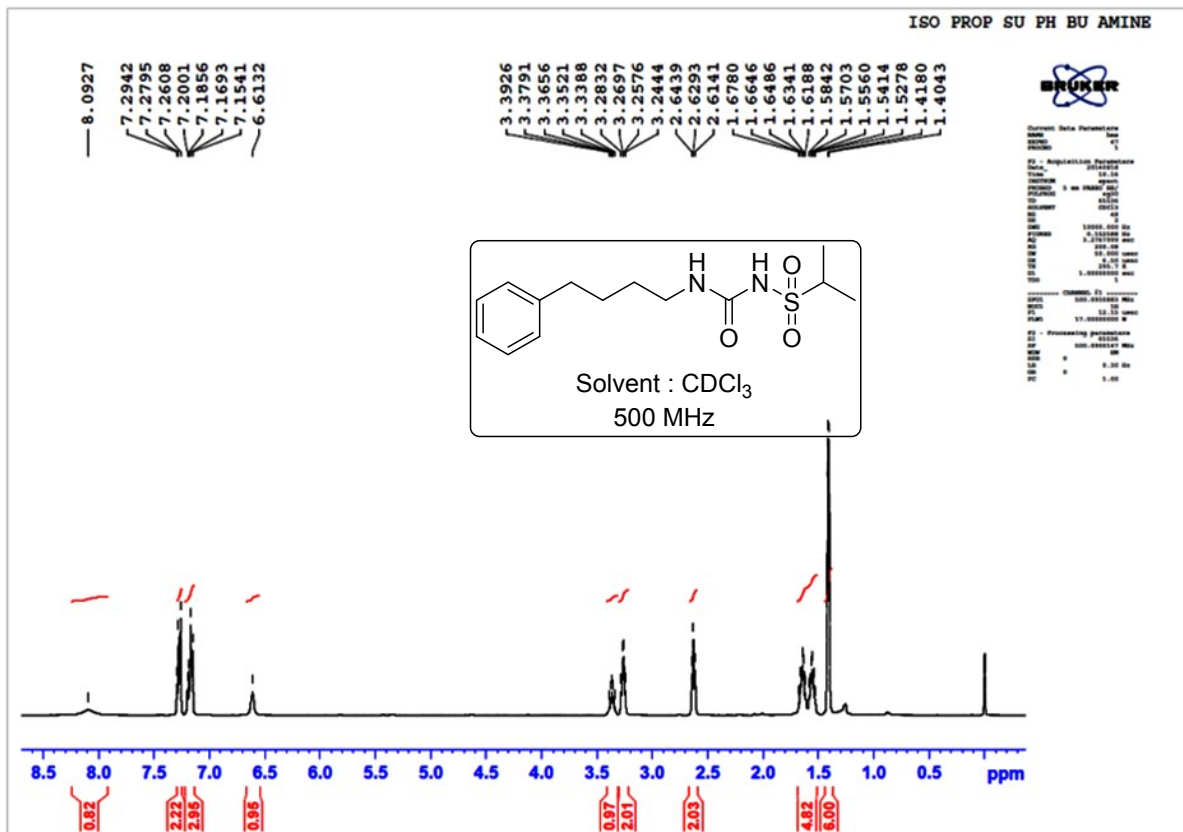

<sup>1</sup>H NMR of compound 4

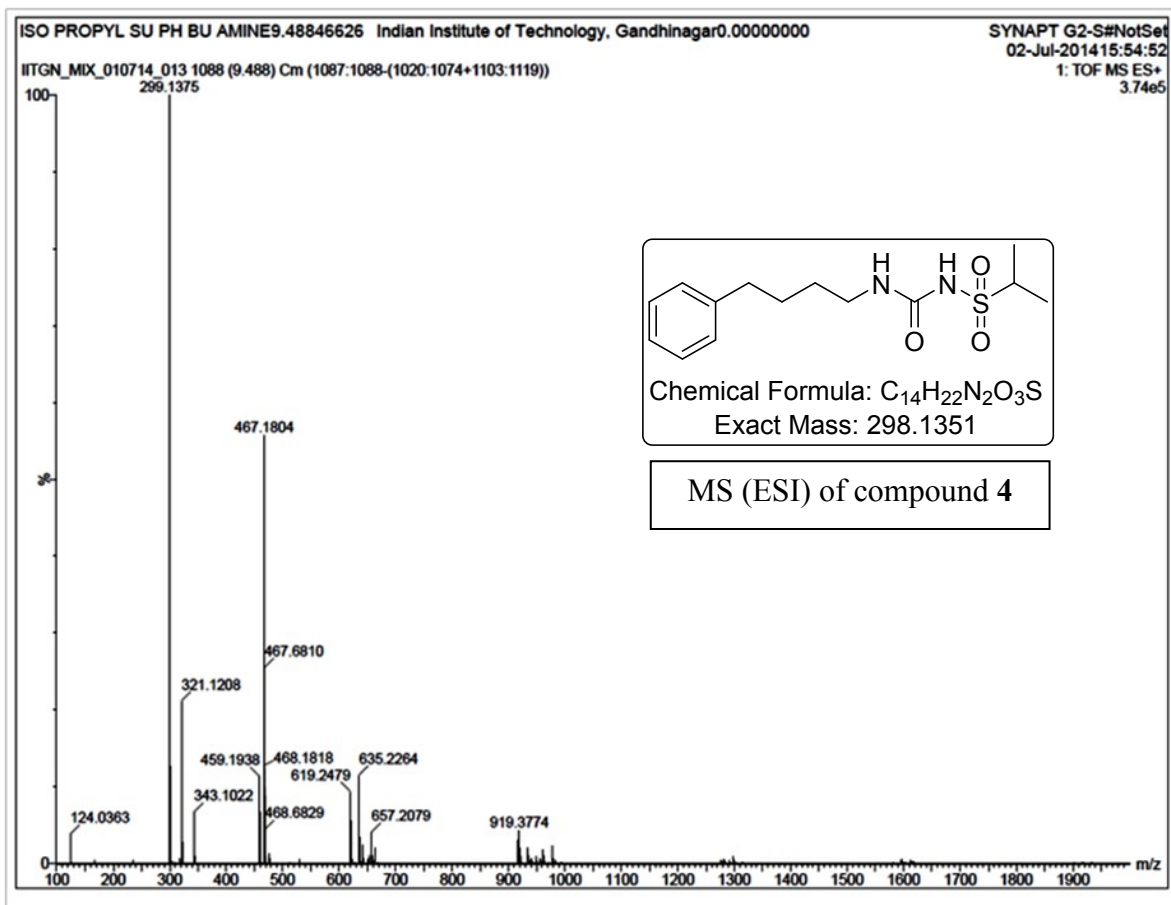

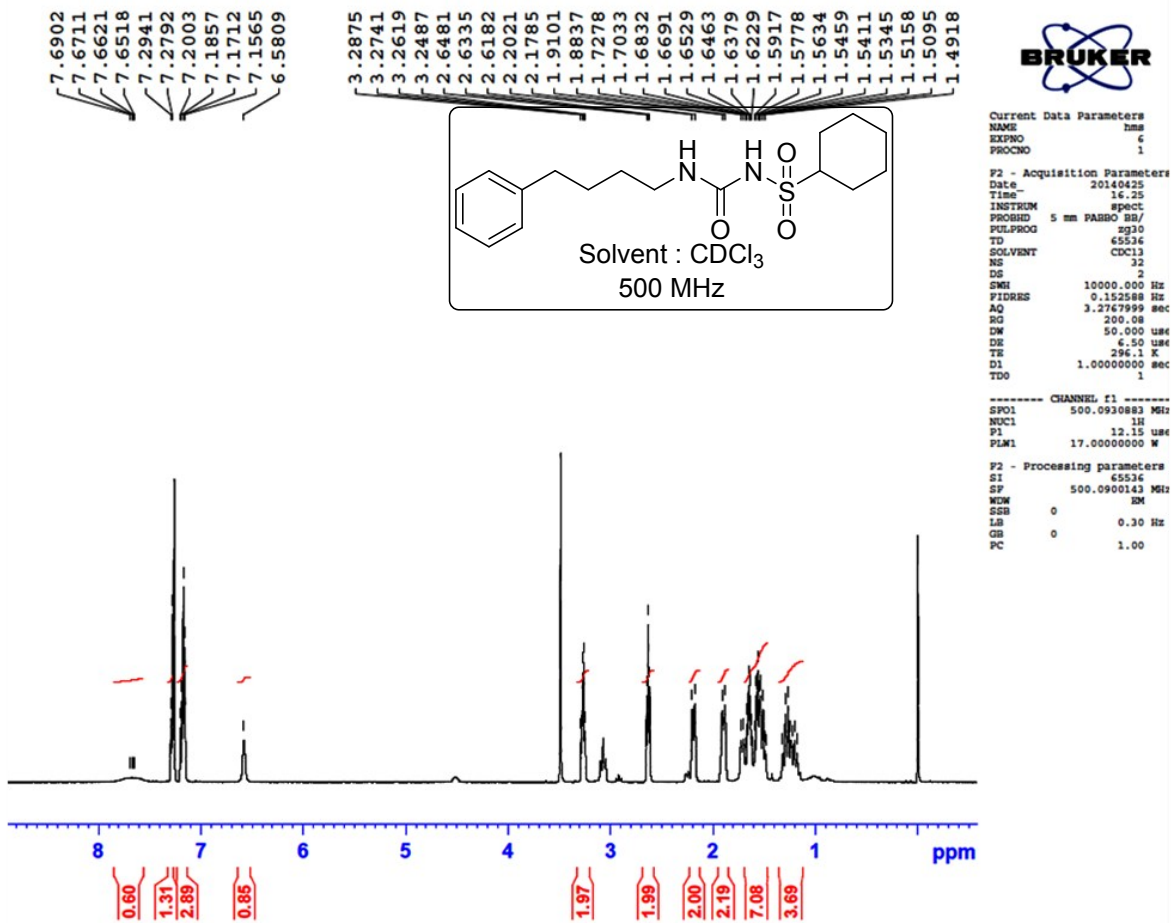

<sup>1</sup>H NMR of compound 5

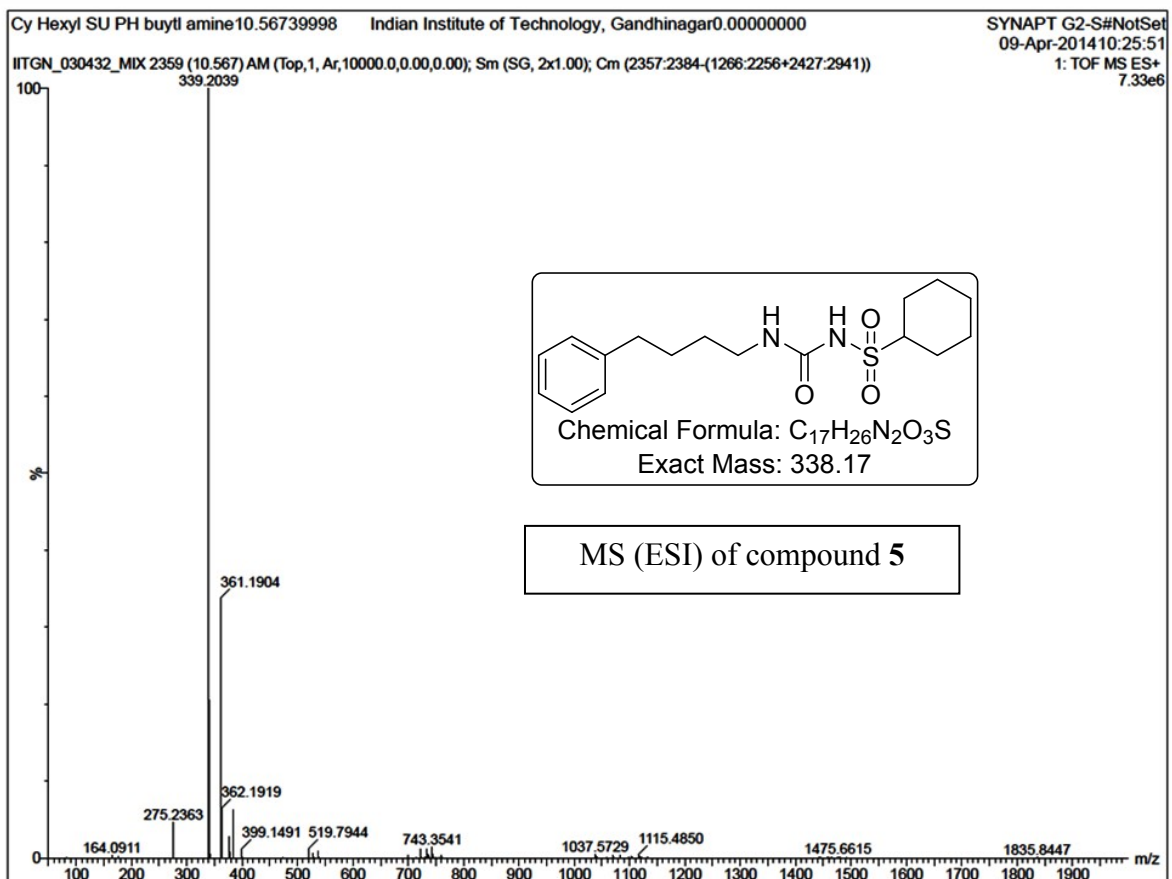



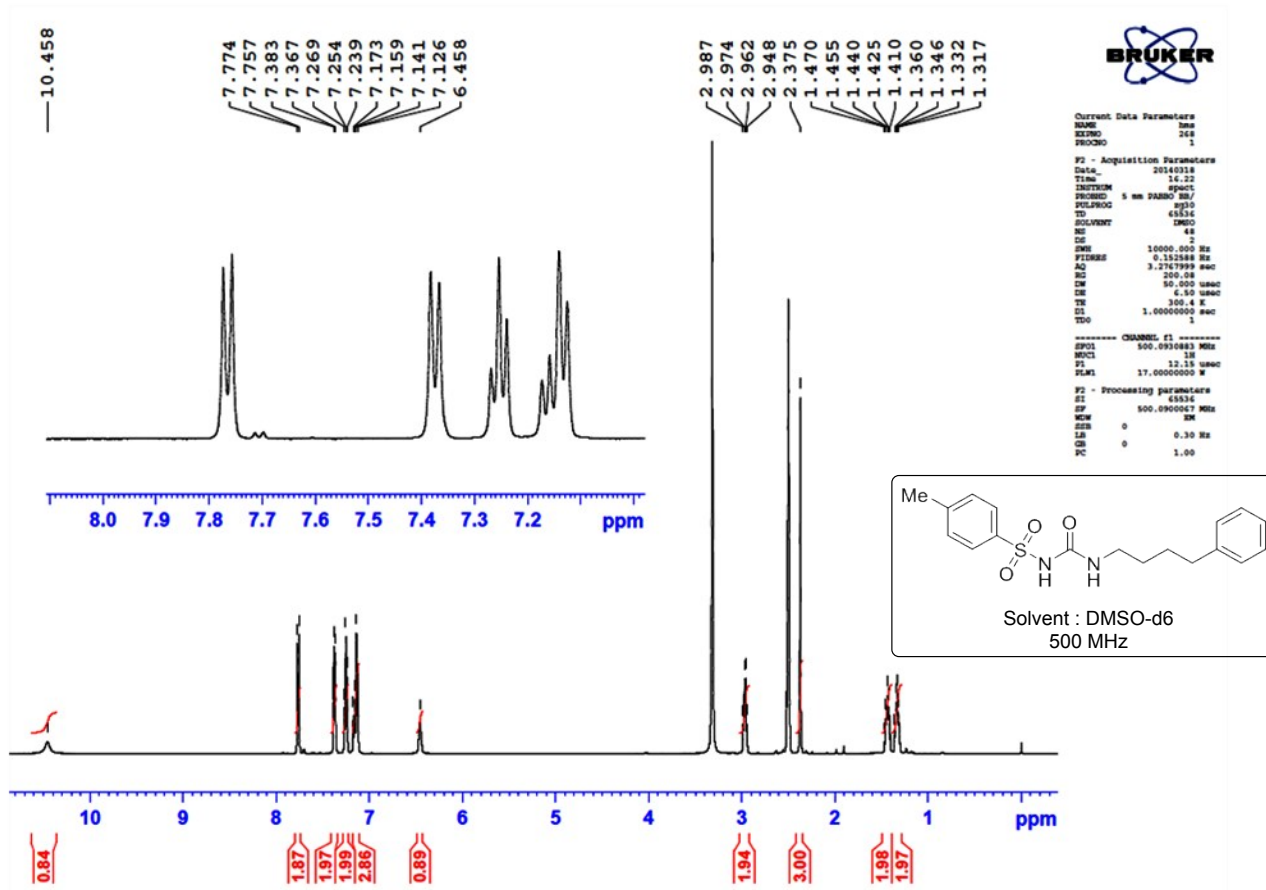

**<sup>1</sup>H NMR of compound 6**

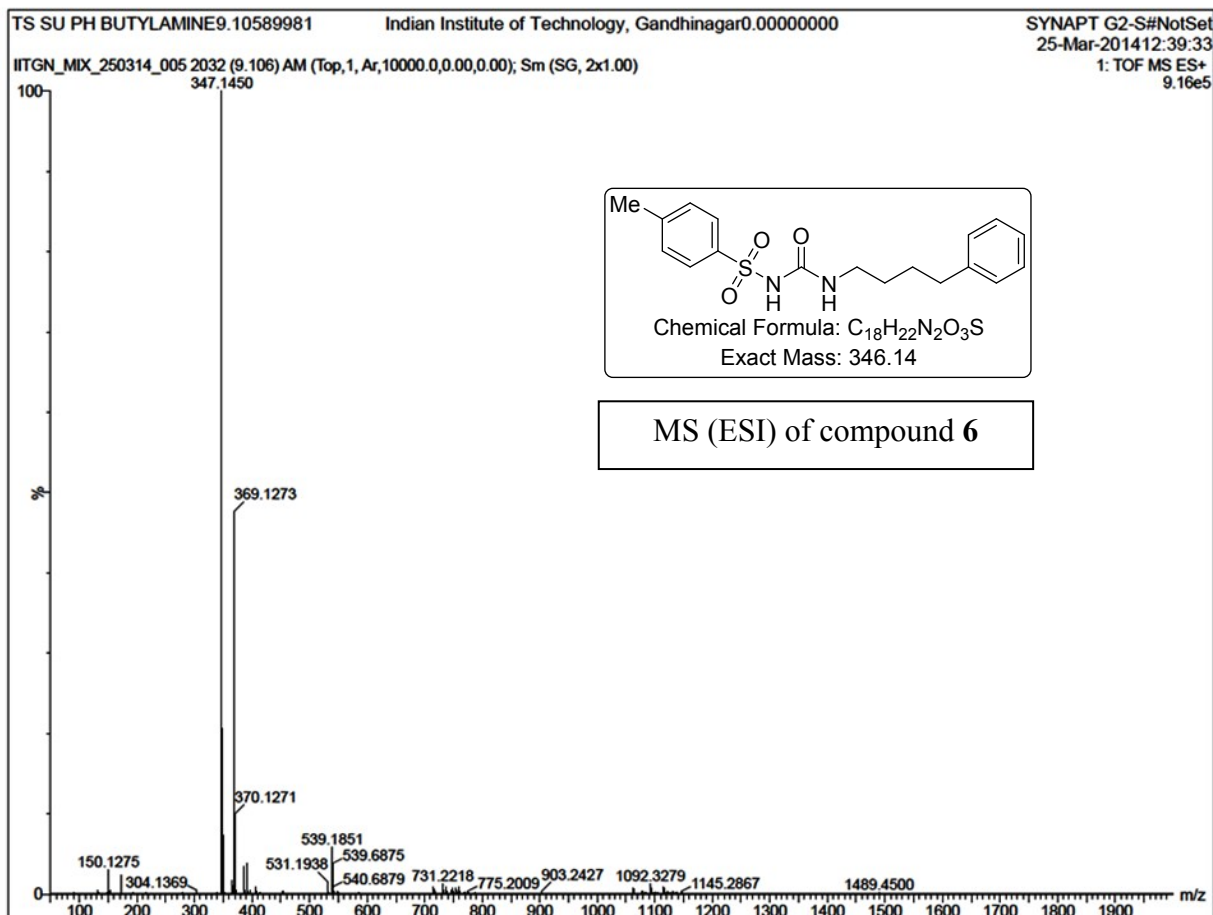

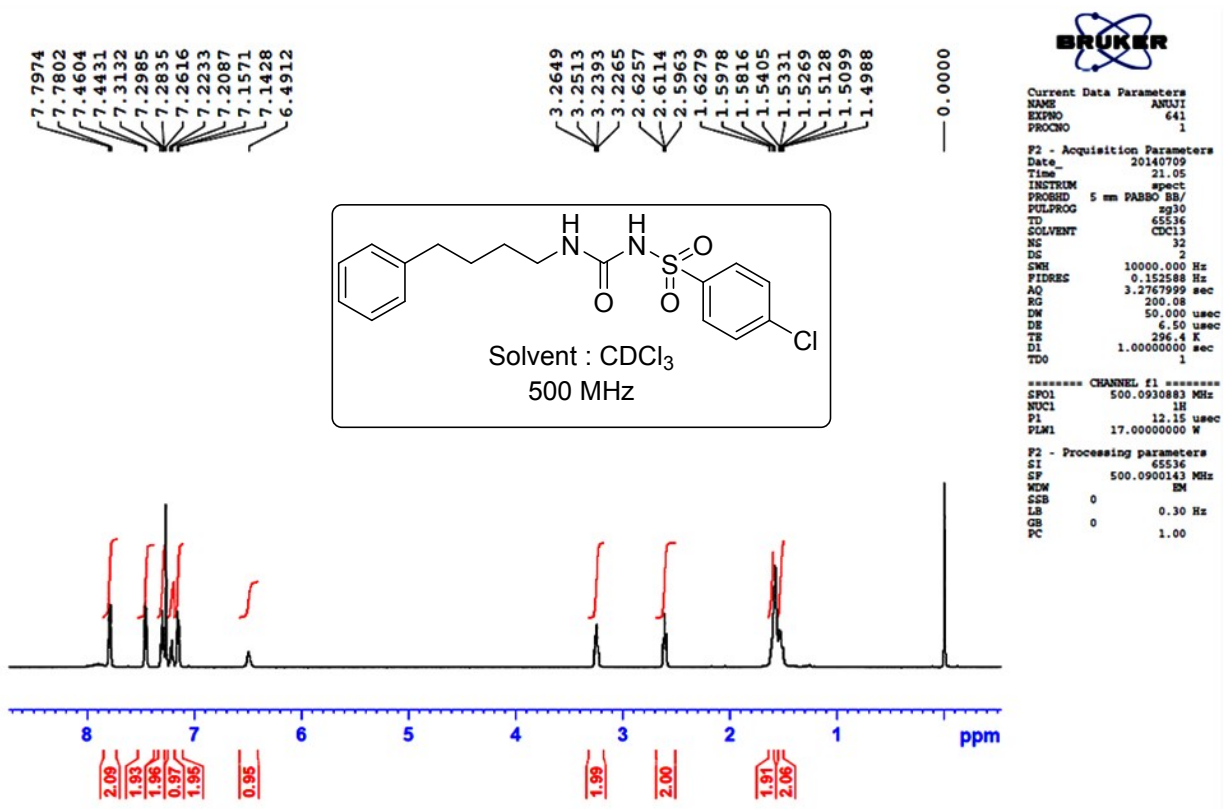

<sup>1</sup>H NMR of compound 7

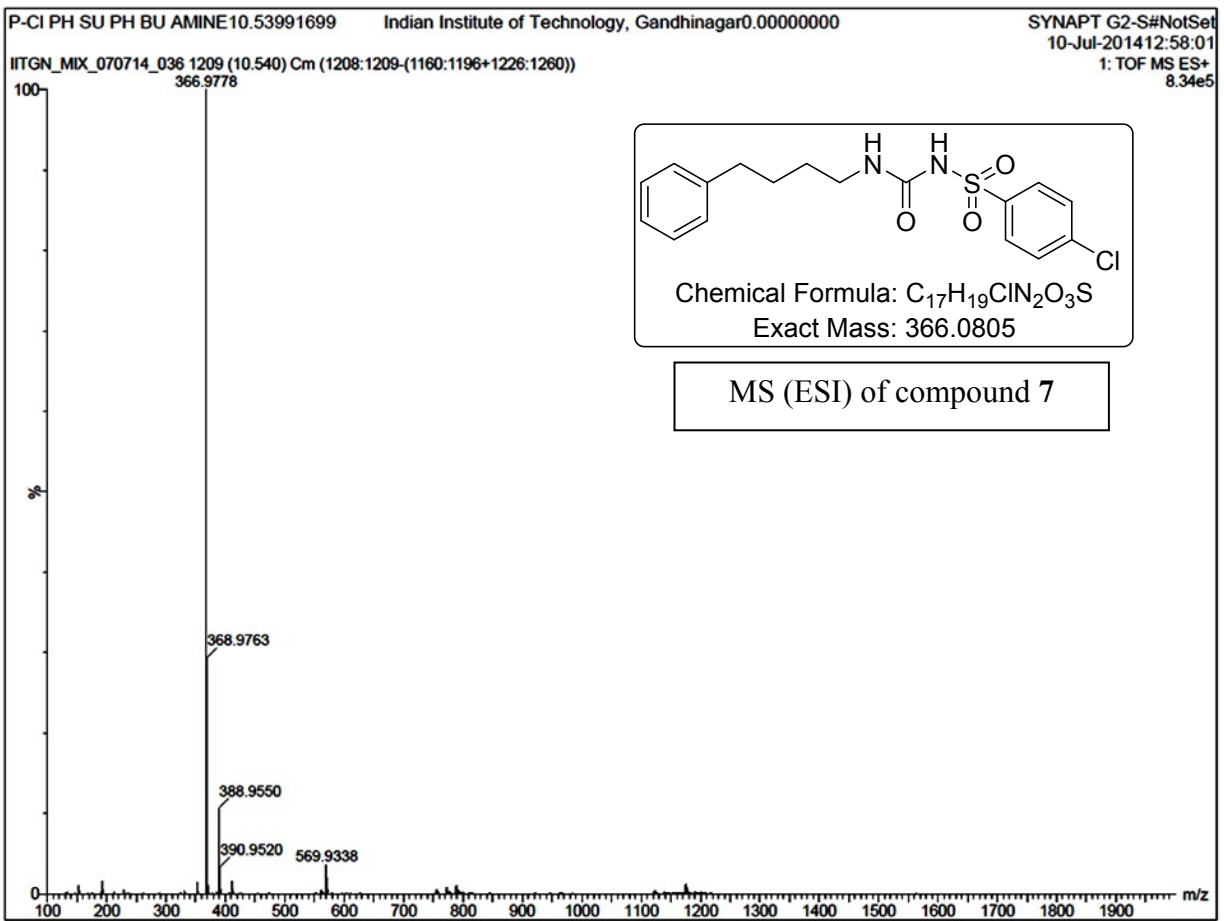

7.7786  
7.3013  
7.2866  
7.2712  
7.2617  
7.2095  
7.1949  
7.1802  
7.1565  
7.1421  
6.9405  
6.5377

3.8486  
3.2625  
3.2492  
3.2370  
3.2243  
2.6191  
2.6049  
2.5897  
1.6254  
1.5840  
1.5423  
1.5290  
1.5148  
1.5012

---0.0000

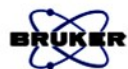

Current Data Parameters  
NAME ANUII  
EXPNO 563  
PROCNO 1

F2 - Acquisition Parameters  
Date\_ 20140703  
Time 19.26  
INSTRUM spect  
PROBHD 5 mm PABBO BBI  
PULPROG zg30  
TD 65536  
SOLVENT CDCl3  
NS 32  
DS 2  
SWH 10000.000 Hz  
FIDRES 0.152588 Hz  
AQ 3.2767999 sec  
RG 200.08  
DW 50.000 usec  
DE 6.50 usec  
TE 296.3 K  
D1 1.00000000 sec  
TDO 1

\*\*\*\*\* CHANNEL f1 \*\*\*\*\*  
SFO1 500.0930883 MHz  
NUC1 1H  
P1 12.15 usec  
PLM1 17.00000000 W

F2 - Processing parameters  
SI 65536  
SF 500.0900143 MHz  
WDW EM  
SSB 0  
LB 0.30 Hz  
GB 0  
PC 1.00

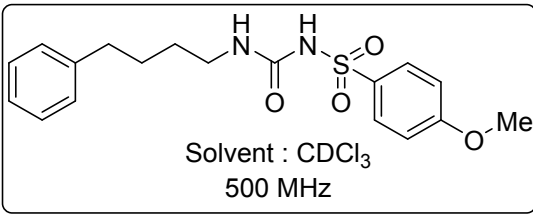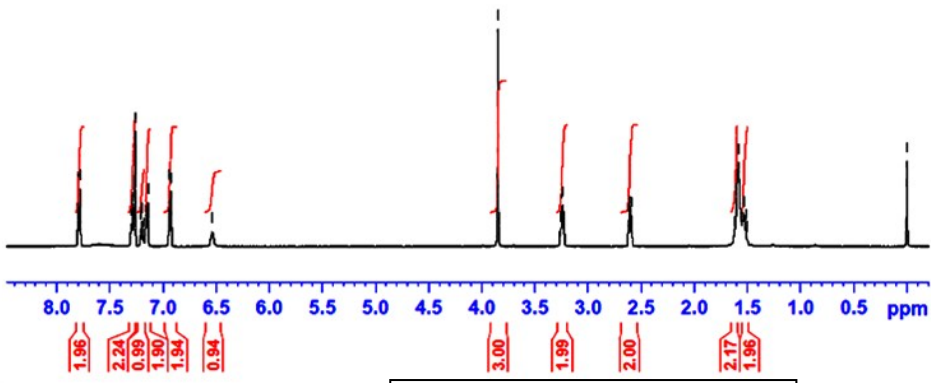

<sup>1</sup>H NMR of compound 8

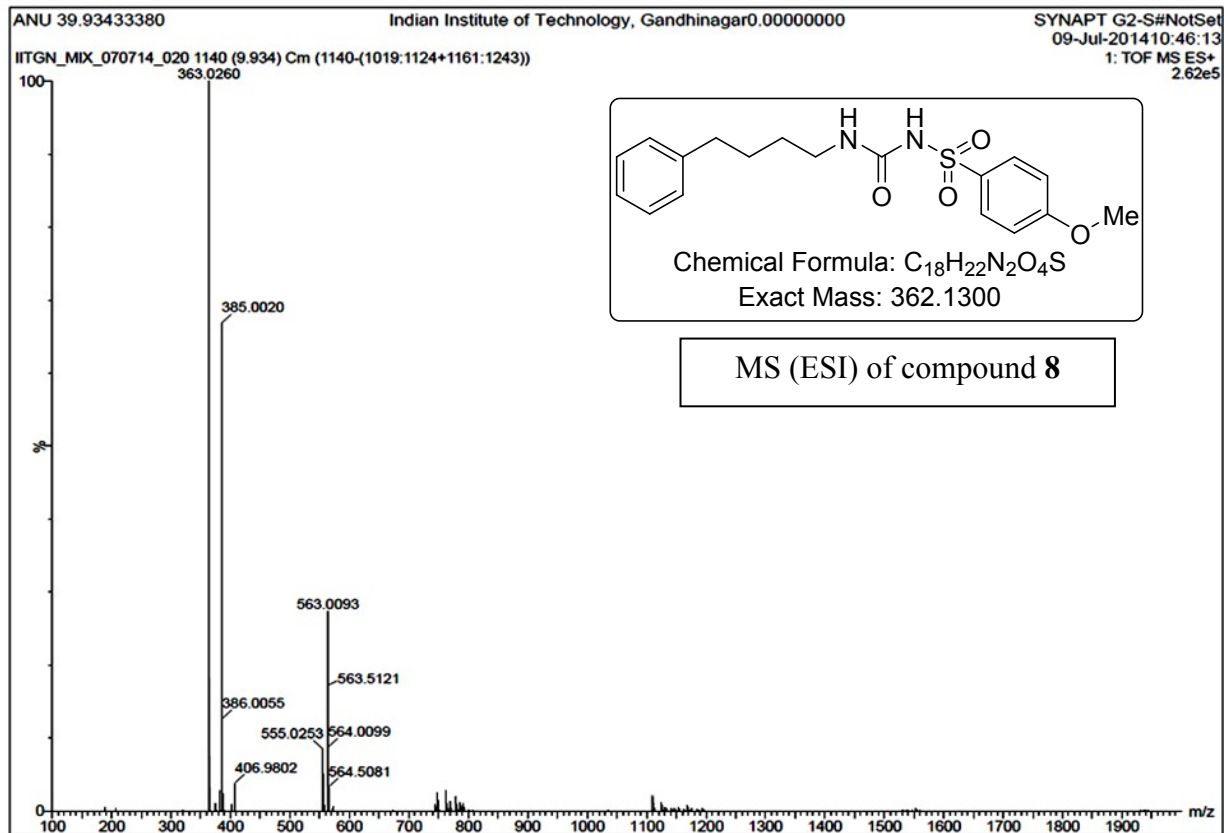

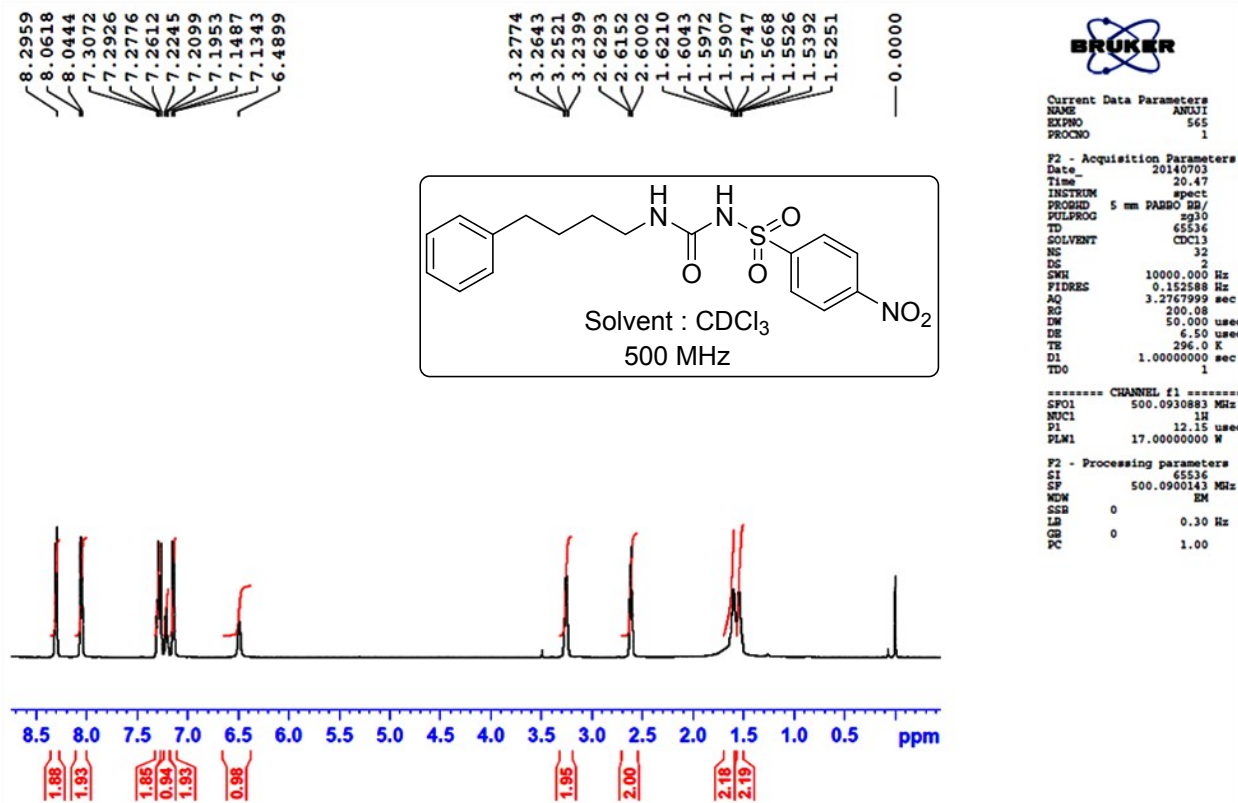

<sup>1</sup>H NMR of compound 9

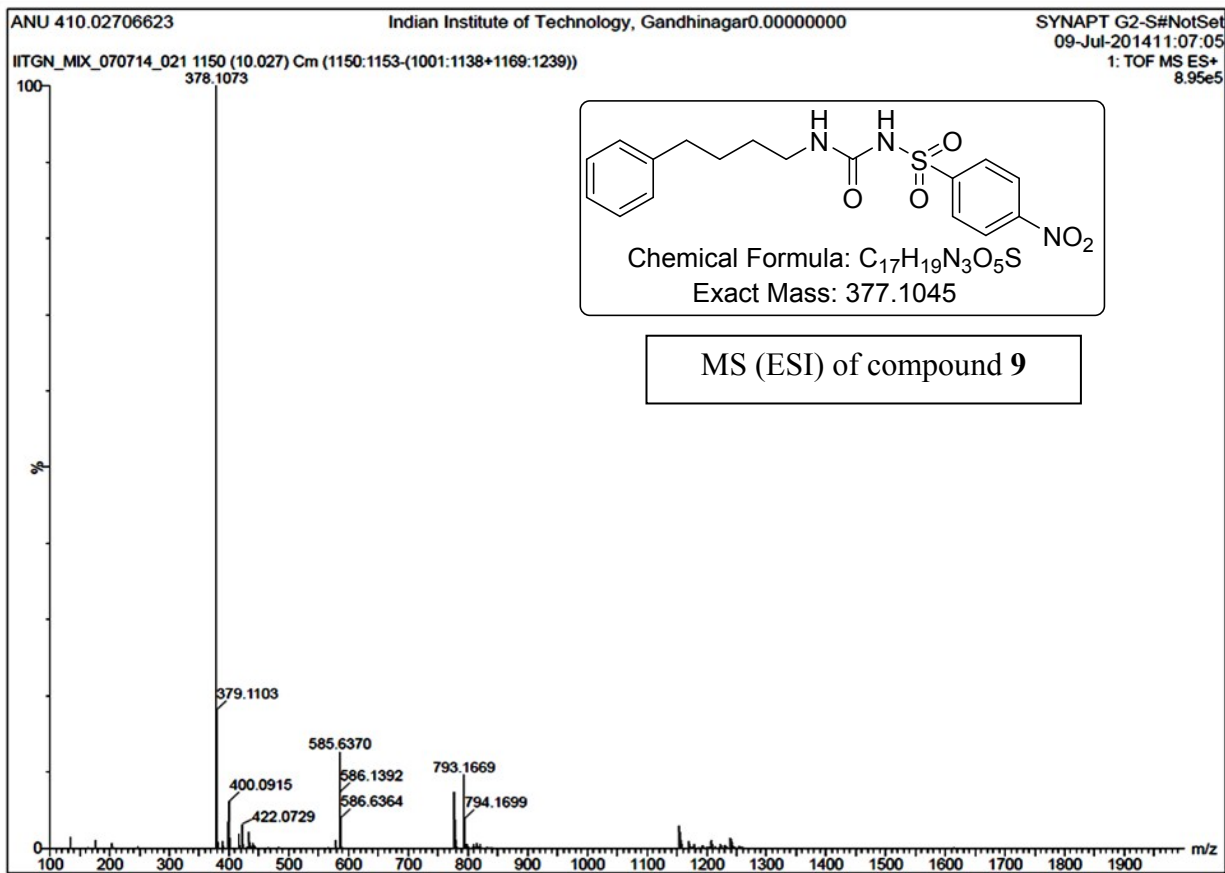

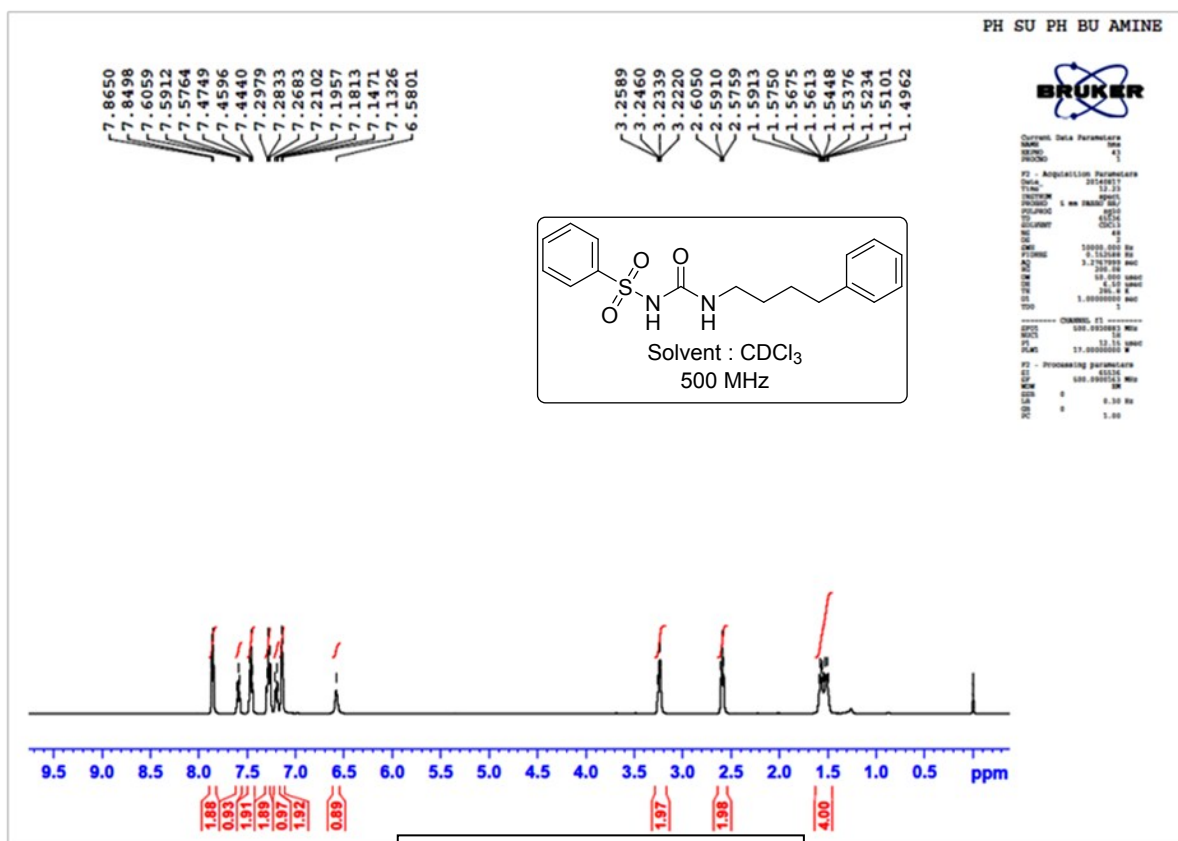<sup>1</sup>H NMR of compound 10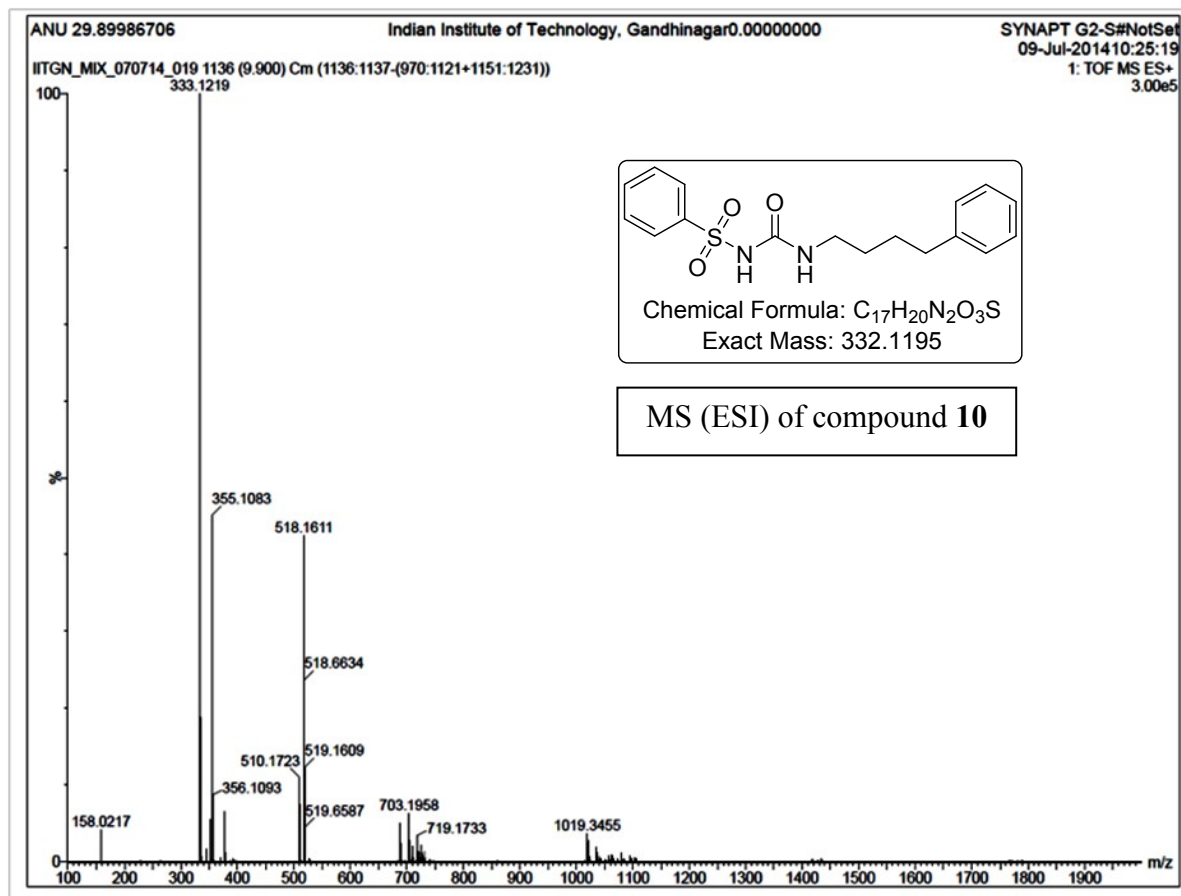

benzothiazole su

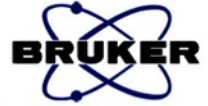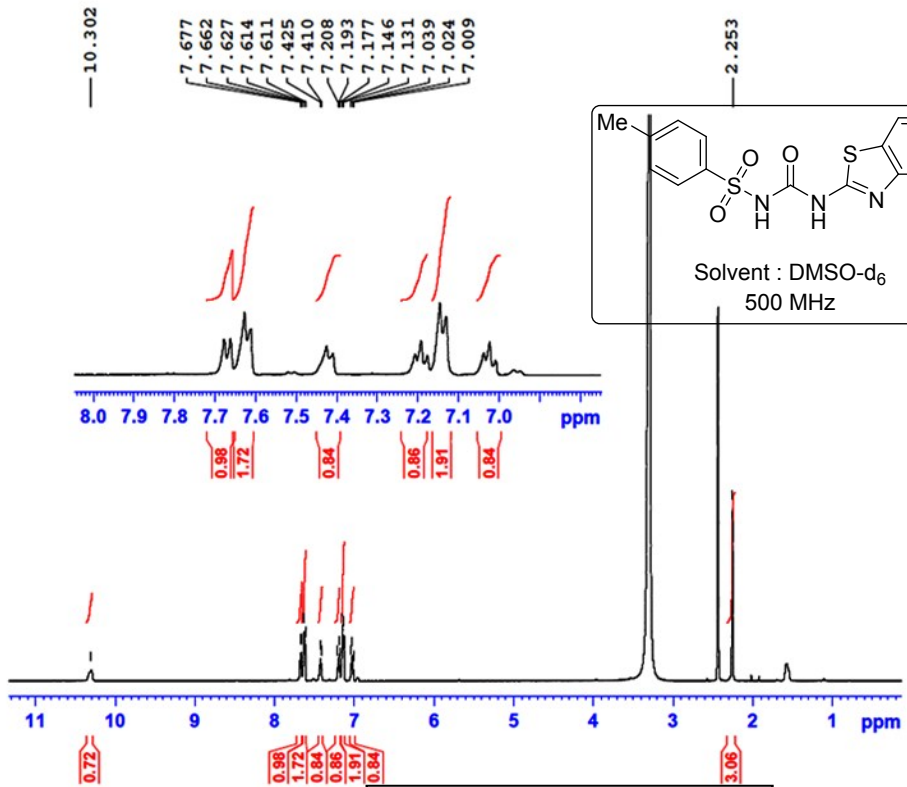

Current Data Parameters  
NAME althaf  
EXPNO 453  
PROCNO 1

F2 - Acquisition Parameters  
Date\_ 20140129  
Time\_ 0.56  
INSTRUM spect  
PROBHD 5 mm PABBO BB/  
PULPROG zg30  
TD 65536  
SOLVENT DMSO  
NS 32  
DS 2  
SWH 10000.000 Hz  
FIDRES 0.152588 Hz  
AQ 3.2767999 sec  
RG 200.08  
DW 50.000 usec  
DE 6.50 usec  
TE 297.8 K  
D1 1.00000000 sec  
TDO 1

----- CHANNEL f1 -----  
SFO1 500.0930883 MHz  
NUC1 1H  
P1 12.15 usec  
PLW1 17.00000000 W

F2 - Processing parameters  
SI 65536  
SF 500.0900392 MHz  
WDW EM  
SSB 0  
LB 0.30 Hz  
GB 0  
PC 1.00

<sup>1</sup>H NMR of compound 11

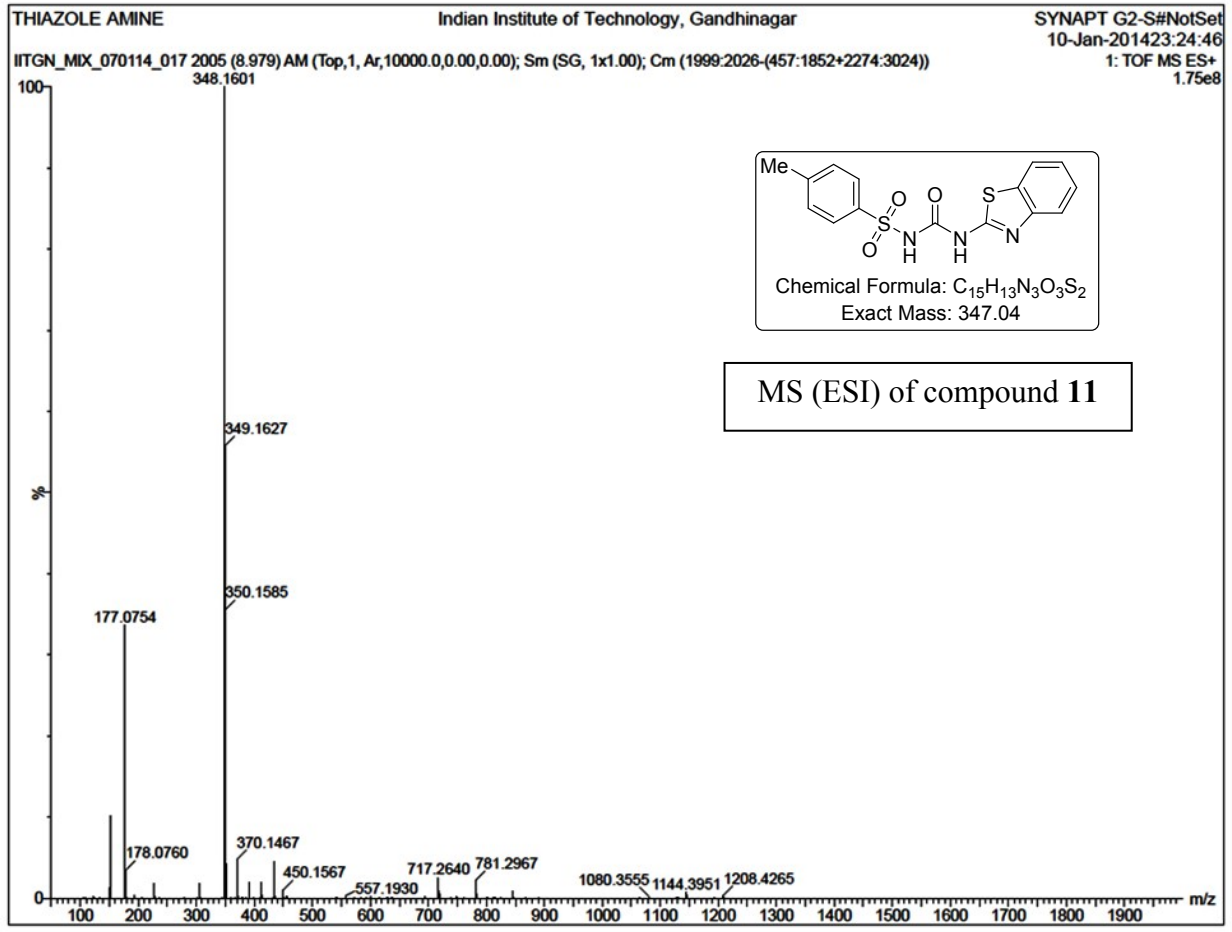

MS (ESI) of compound 11

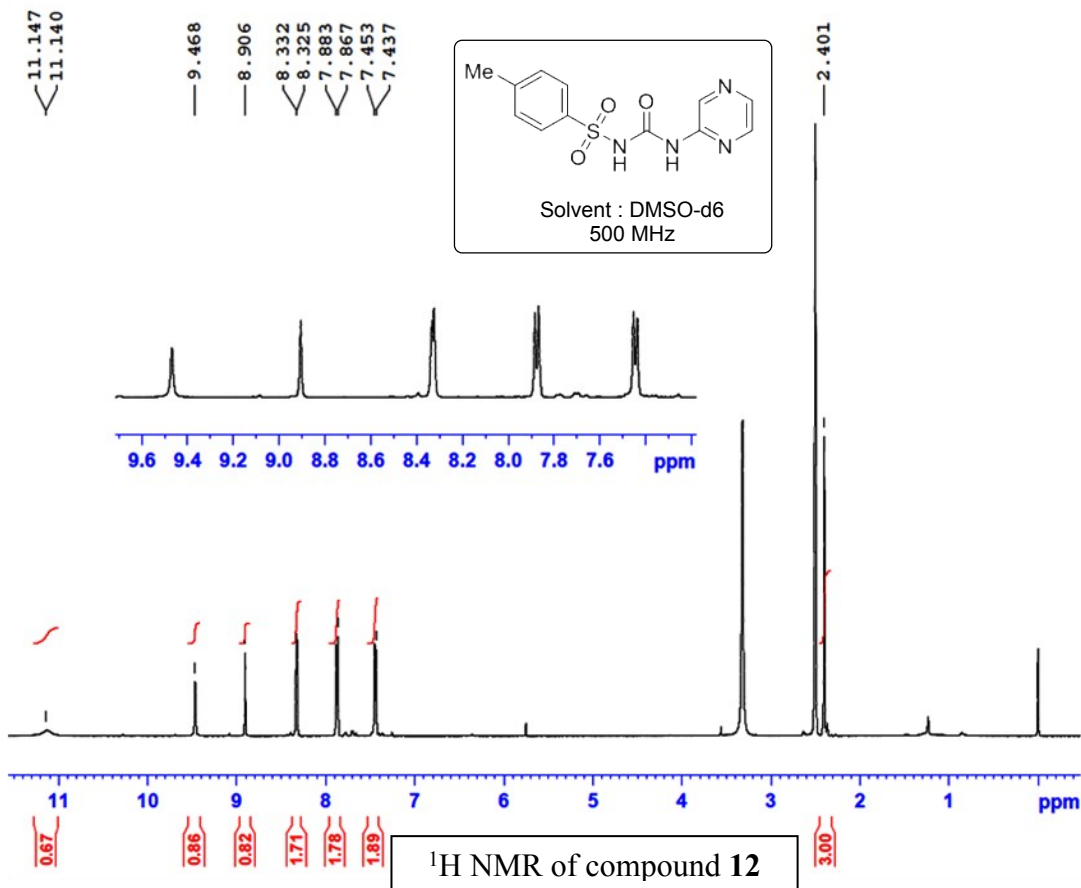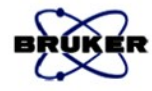

Current Data Parameters  
NAME: 12  
EXPNO: 10  
PROCNO: 1

F2 - Acquisition Parameters  
Date\_: 20140314  
Time: 18.24  
INSTRUM: spect  
PROBHD: 5 mm QNP1H  
PULPROG: zgpg30  
TD: 65536  
SOLVENT: DMSO  
NS: 48  
DS: 2  
SWH: 10000.000 Hz  
FIDRES: 0.112588 Hz  
AQ: 3.2757500 sec  
RG: 200.00  
SQ: 50.000 usec  
DE: 6.50 usec  
TE: 299.9 K  
SI: 1.00000000 sec  
TDO: 1

----- CHANNEL f1 -----  
SFO1: 500.000000 MHz  
NUC1: 1H  
P1: 12.15 usec  
PLM1: 17.0000000 W

F2 - Processing parameters  
SI: 65536  
SF: 500.000000 MHz  
WDW: EM  
SSB: 0  
LB: 0.30 Hz  
GB: 0  
PC: 1.00

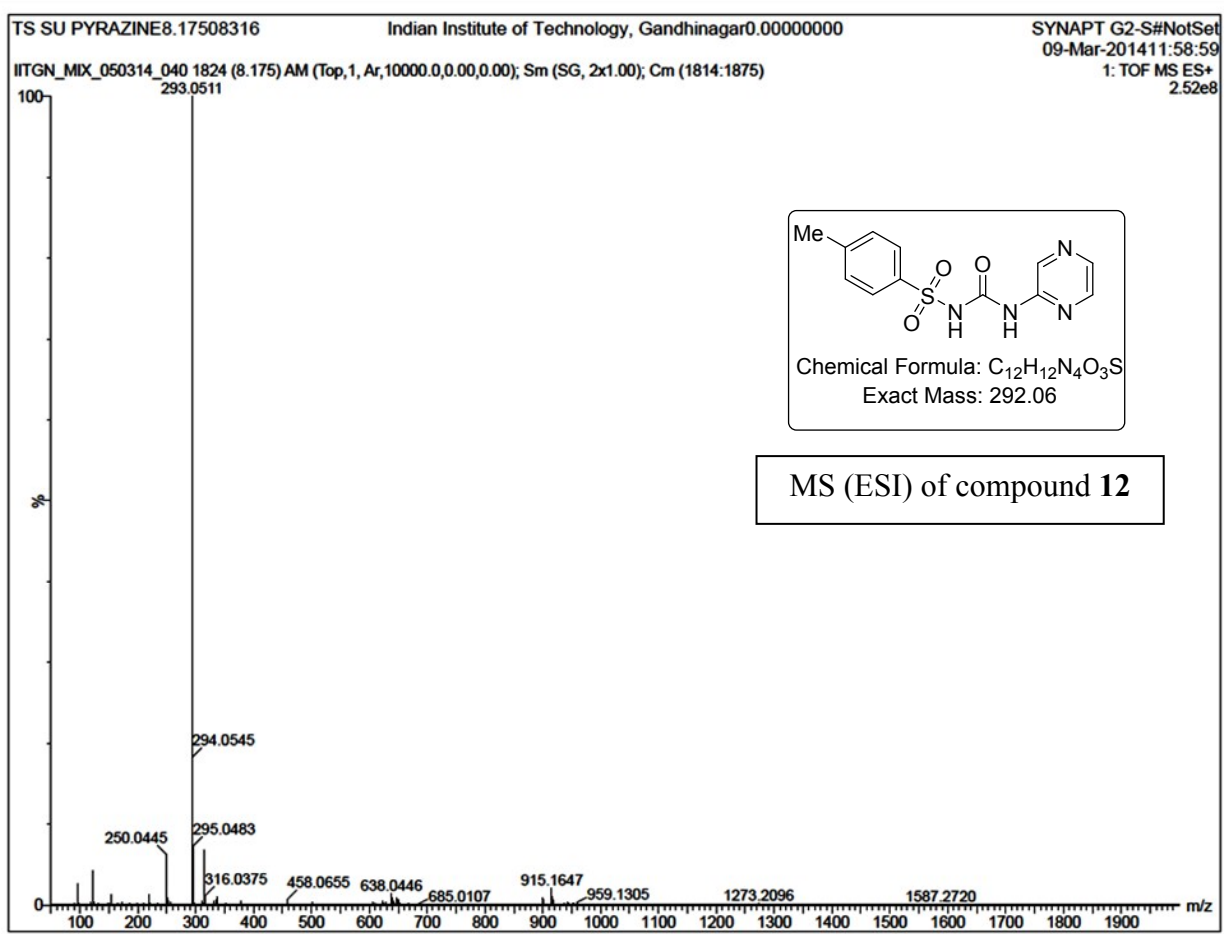

TS SU PYRAZINE8.17508316

Indian Institute of Technology, Gandhinagar0.0000000

SYNAPT G2-S#NotSet

ITGN\_MIX\_050314\_040 1824 (8.175) AM (Top,1, Ar,10000.0,0.00,0.00); Sm (SG, 2x1.00); Cm (1814:1875)

09-Mar-2014 11:58:59  
1: TOF MS ES+  
2.52e8

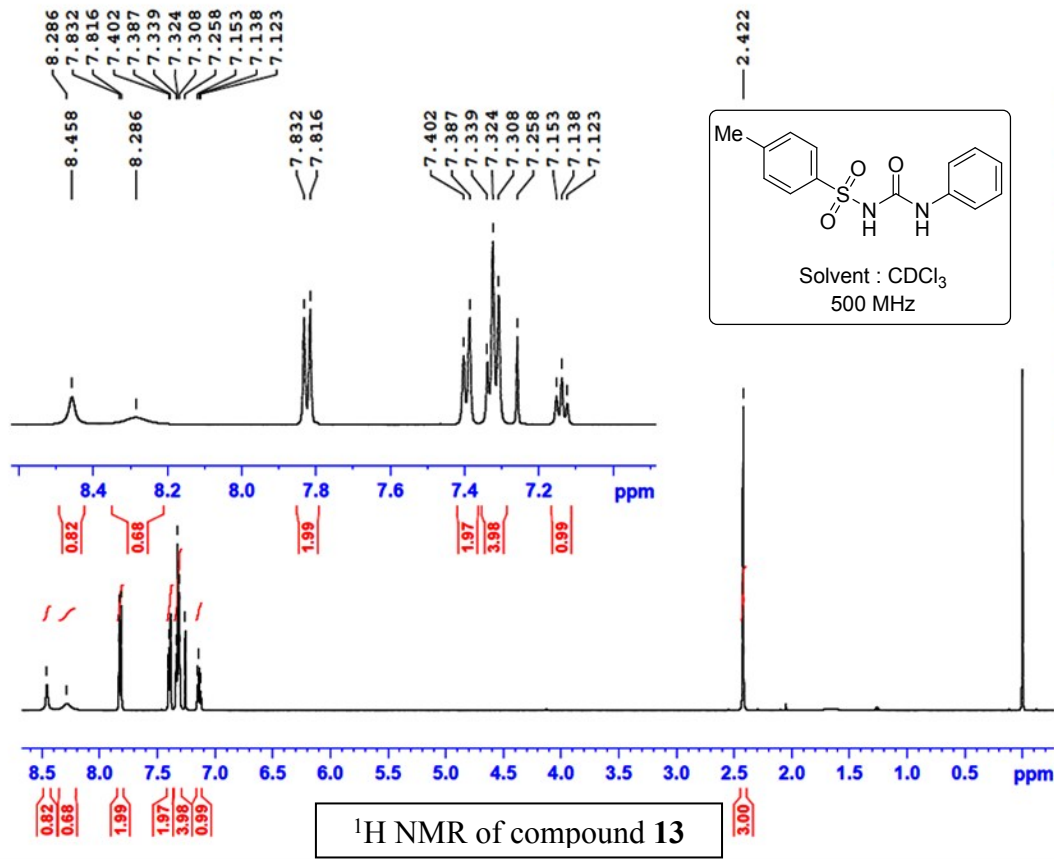

**BRUKER**

Current Data Parameters  
NAME hme  
EXPNO 182  
PROCNO 1

F2 - Acquisition Parameters  
Date\_ 20131229  
Time 15.09  
INSTRUM spect  
PROBHD 5 mm PABBO BB/  
PULPROG zgpg30  
TD 65536  
SOLVENT CDCl3  
NS 16  
DS 2  
SWH 10000.000 Hz  
FIDRES 0.152588 Hz  
AQ 3.2767999 sec  
RG 250.08  
DM 50.000 usec  
DE 6.50 usec  
TE 297.7 K  
D1 1.0000000 sec  
TDO 1

----- CHANNEL f1 -----  
SFO1 500.0930883 MHz  
NOC1 3H  
P1 12.15 usec  
PLM1 17.0000000 W

F2 - Processing parameters  
SI 65536  
SF 500.0930883 MHz  
WDW EM  
SSB 0  
LB 0.30 Hz  
GB 0  
PC 1.00

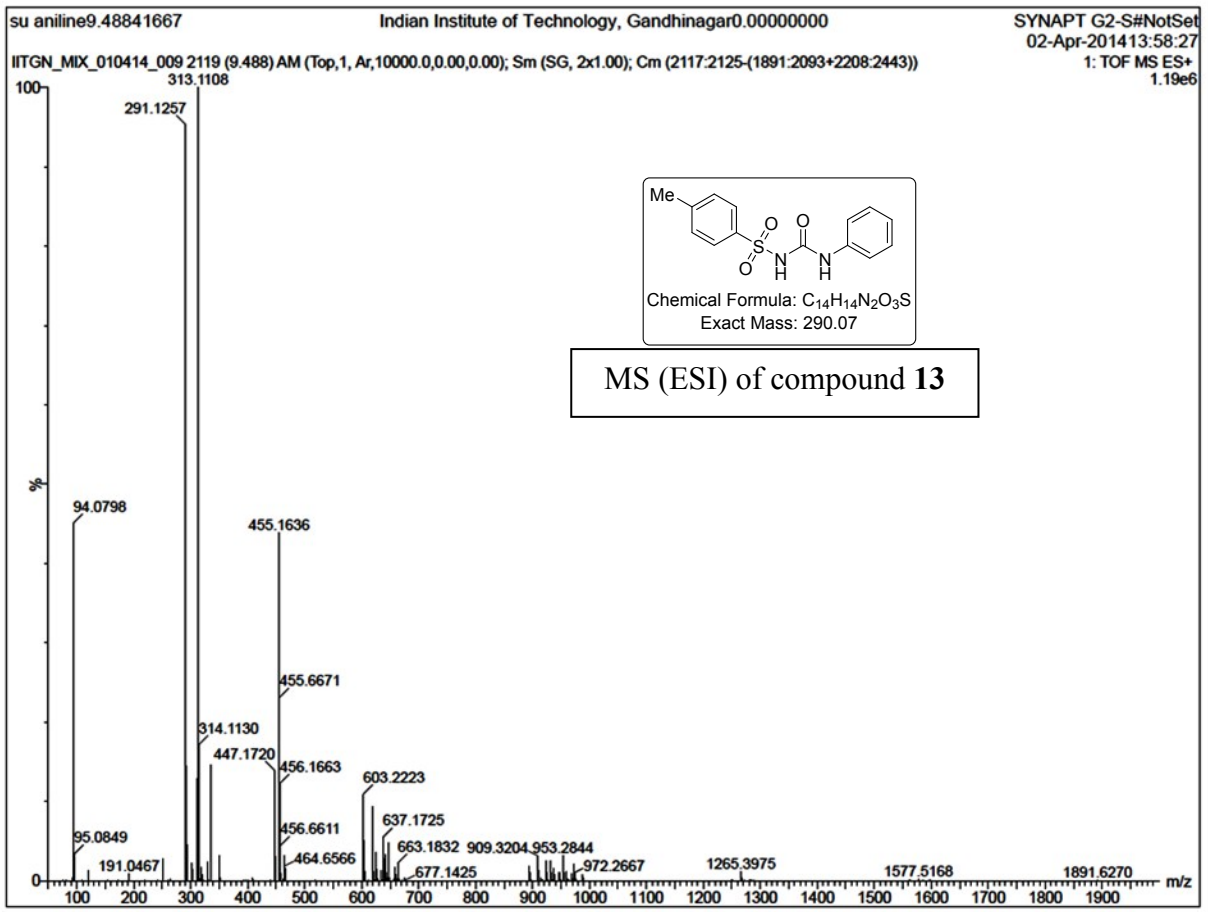



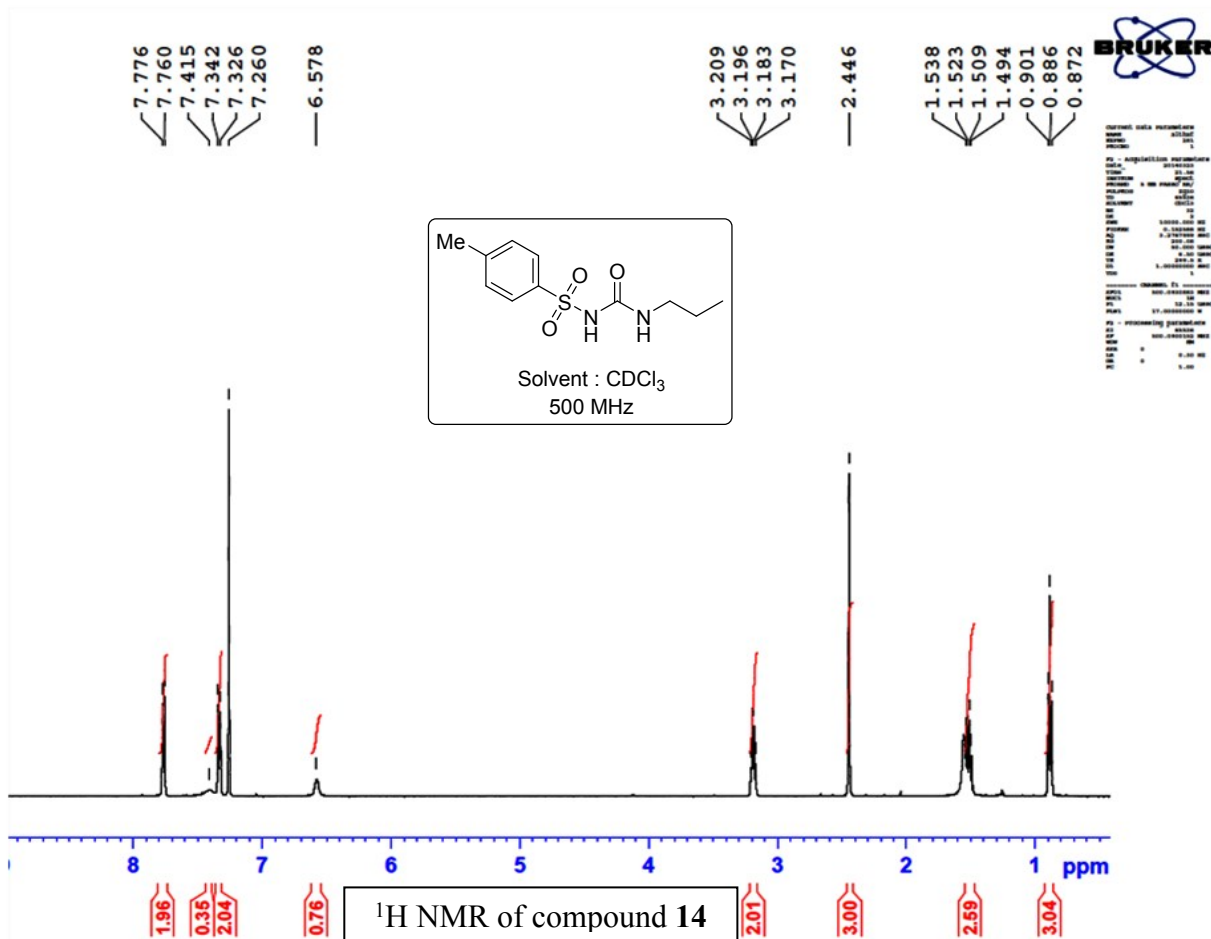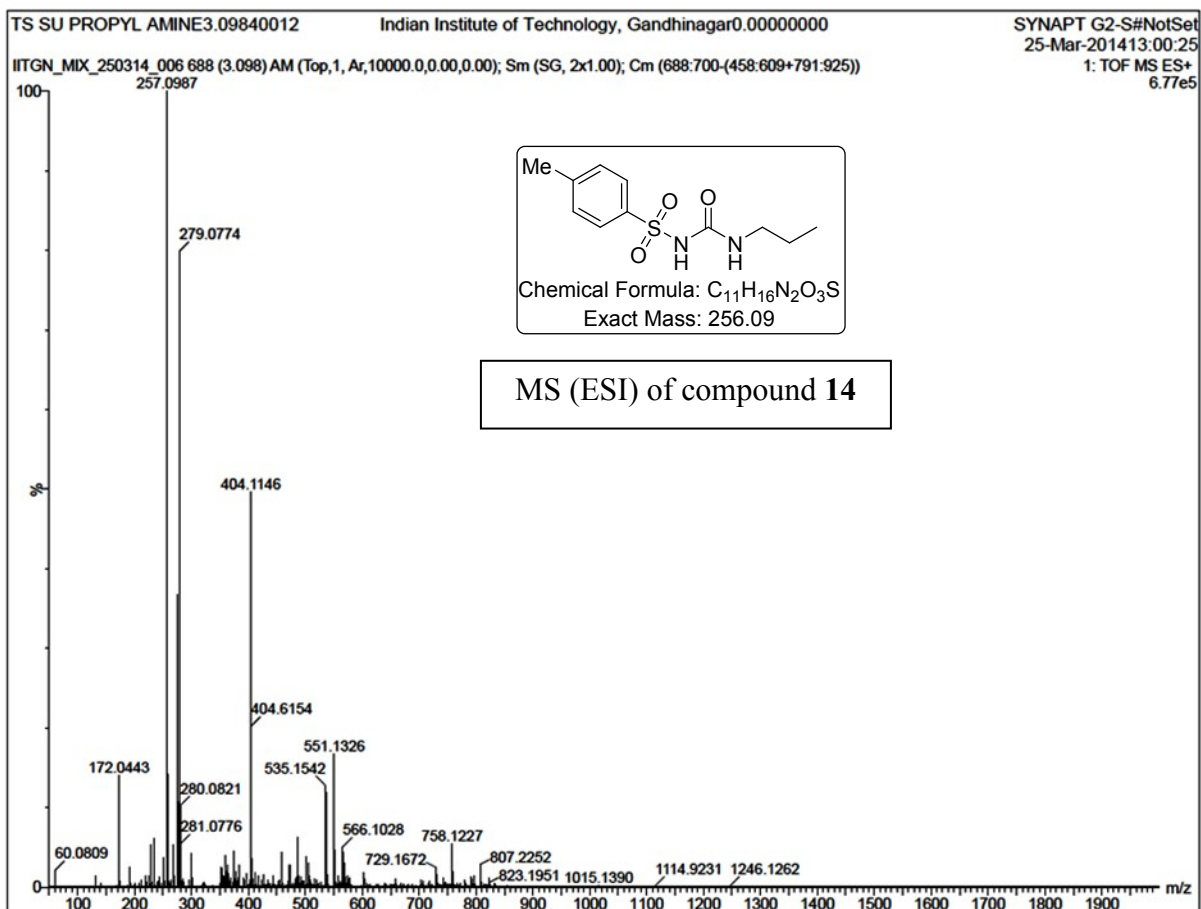

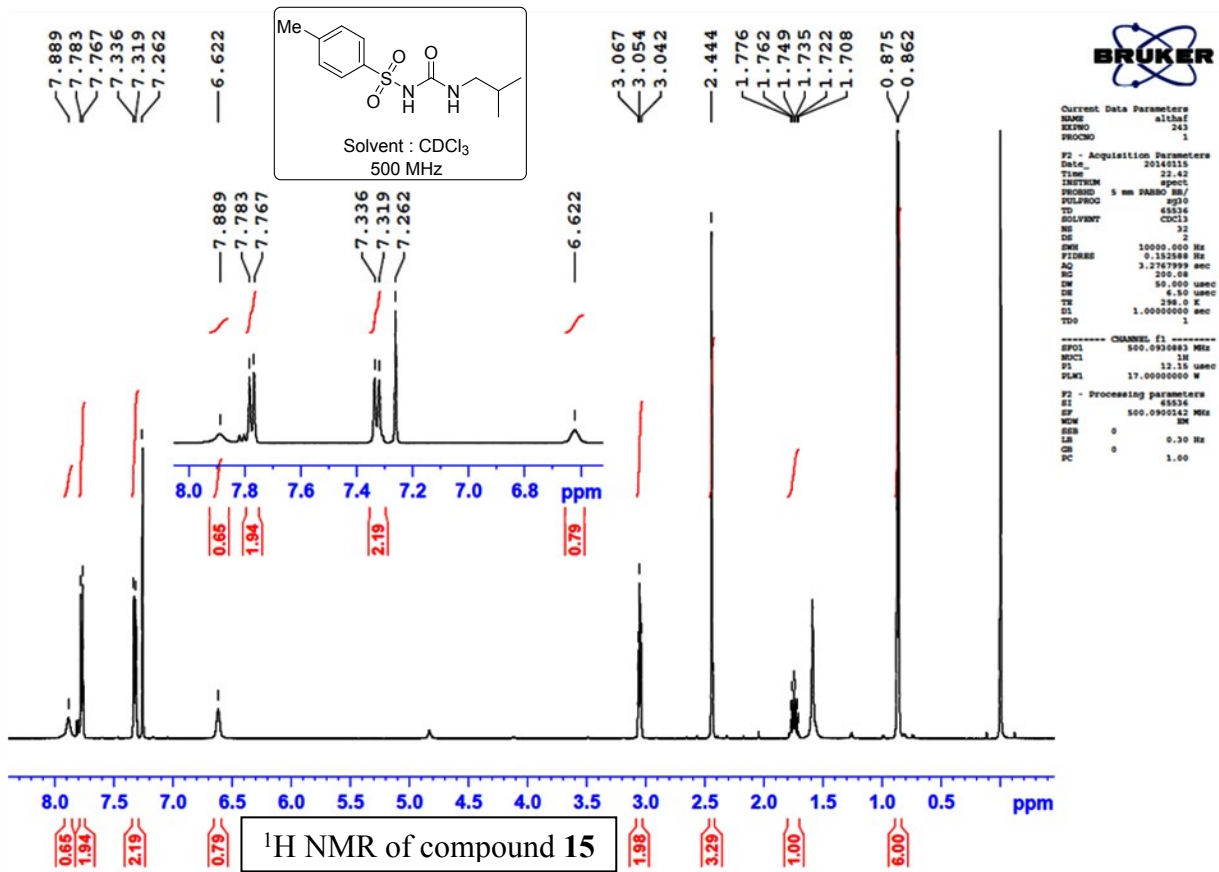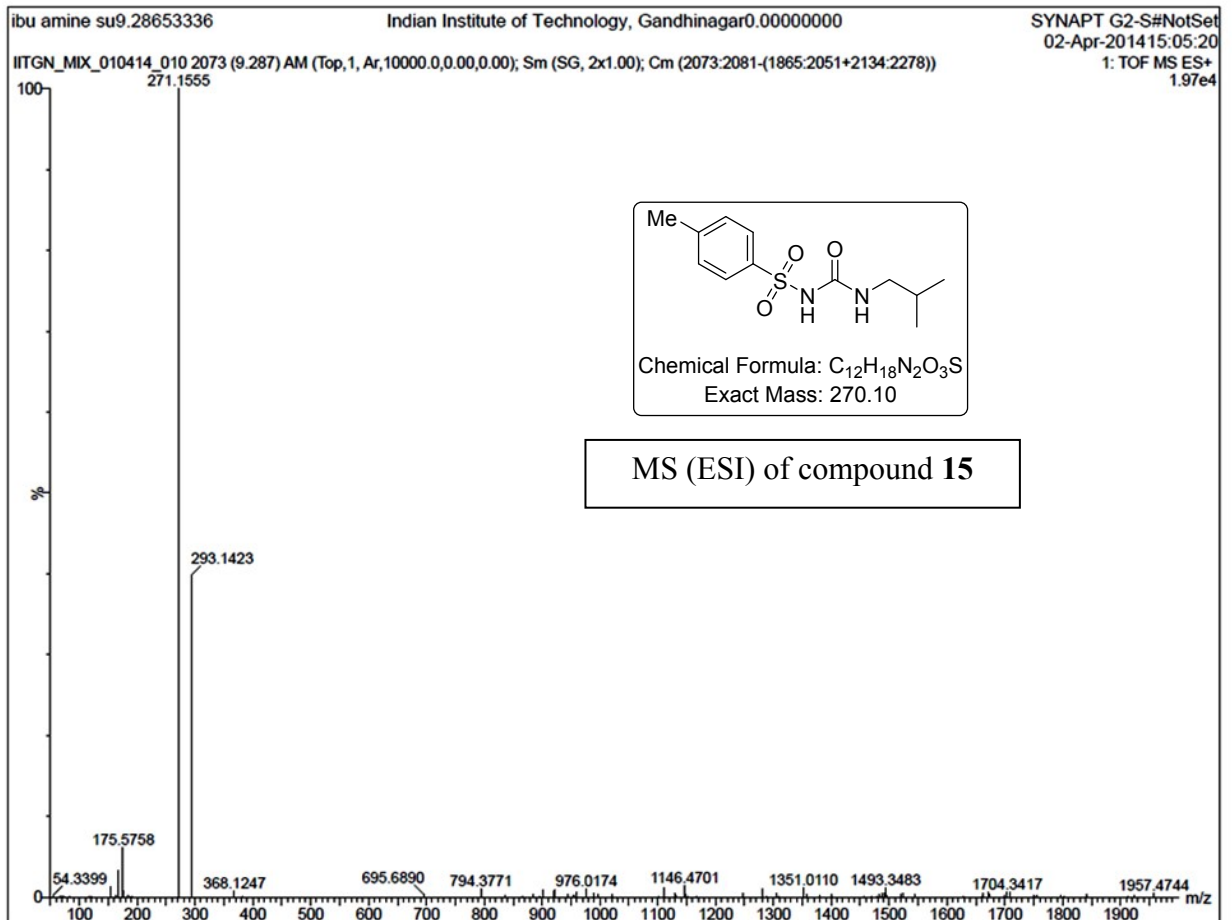

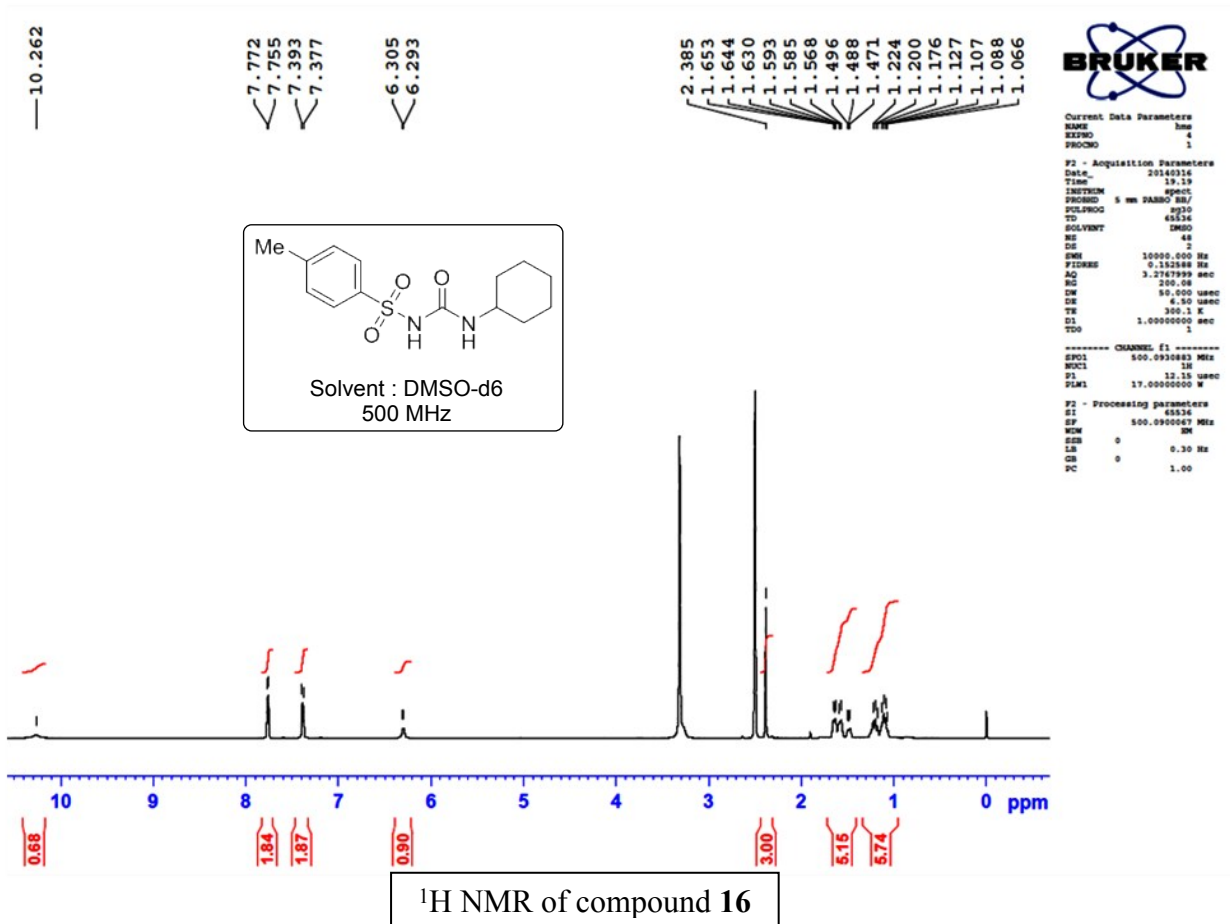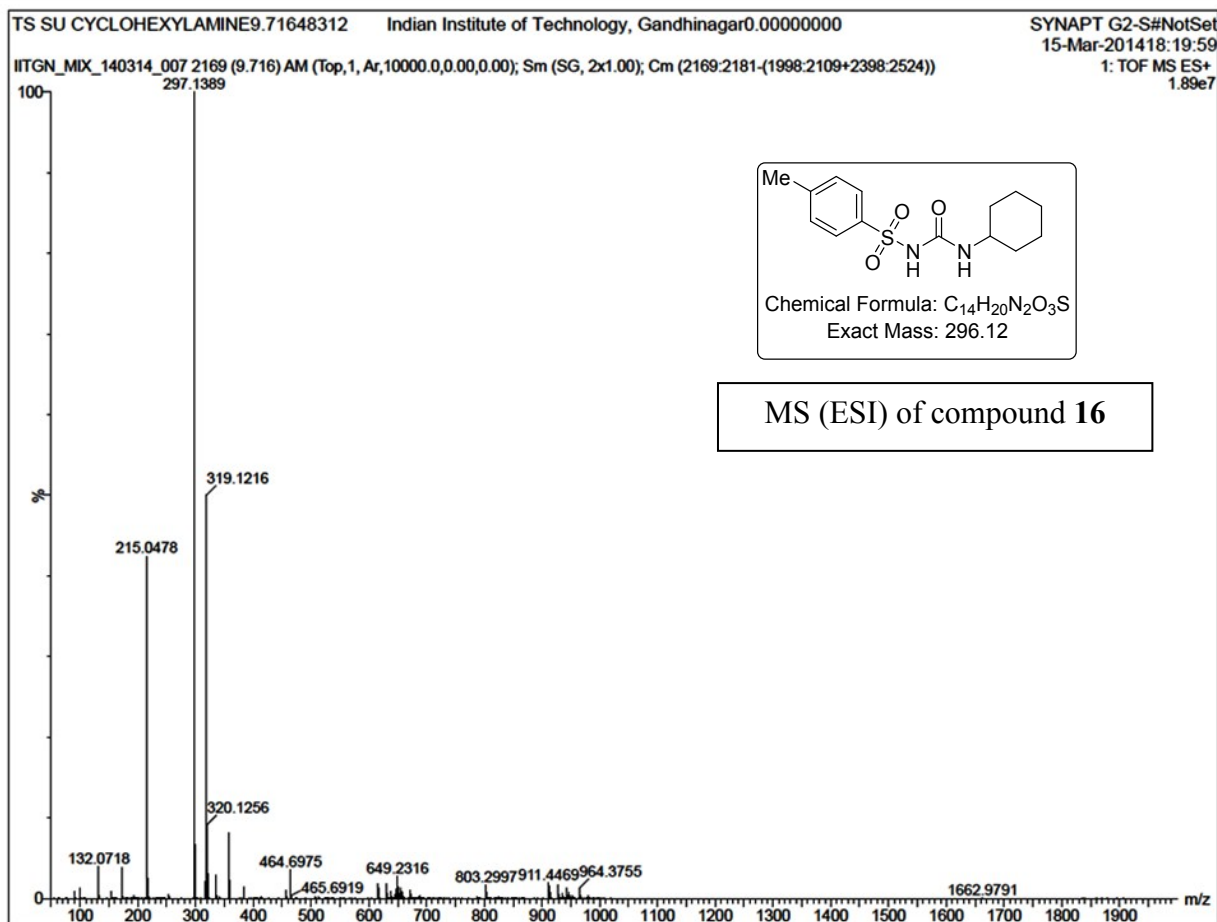

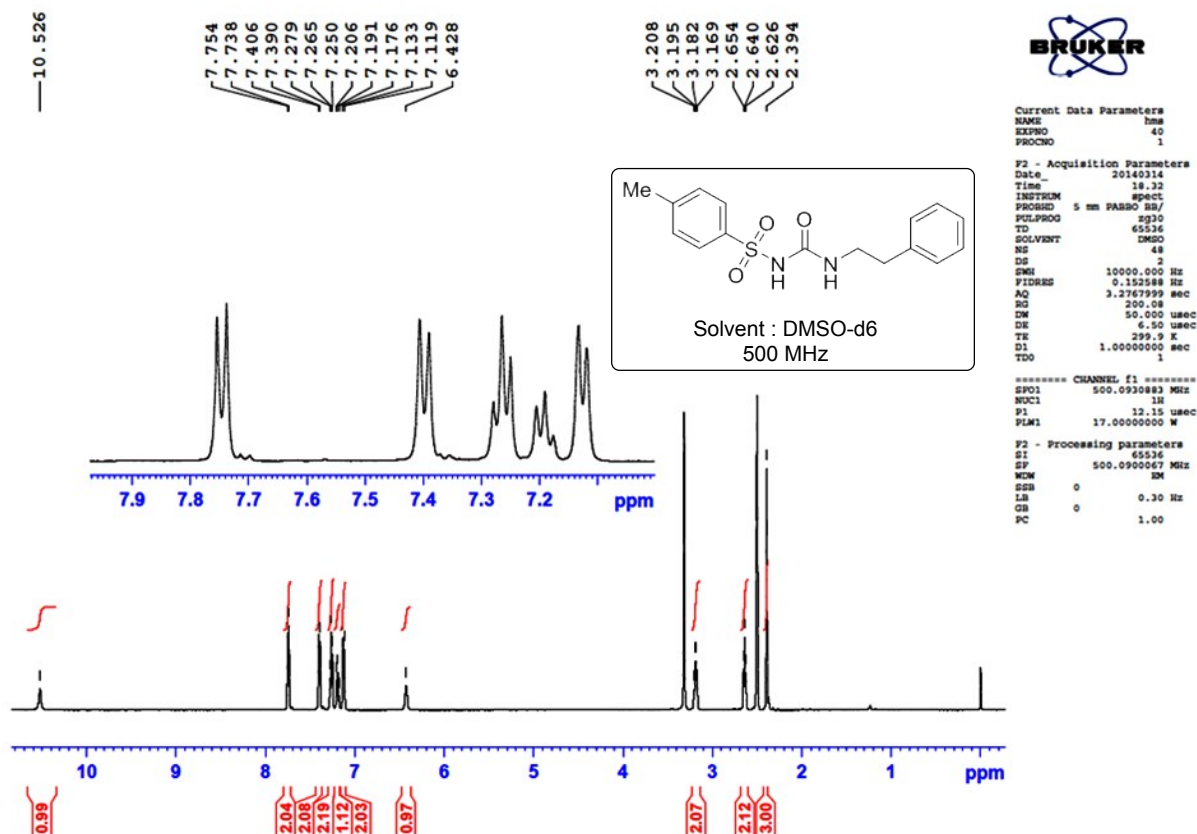

<sup>1</sup>H NMR of compound 17

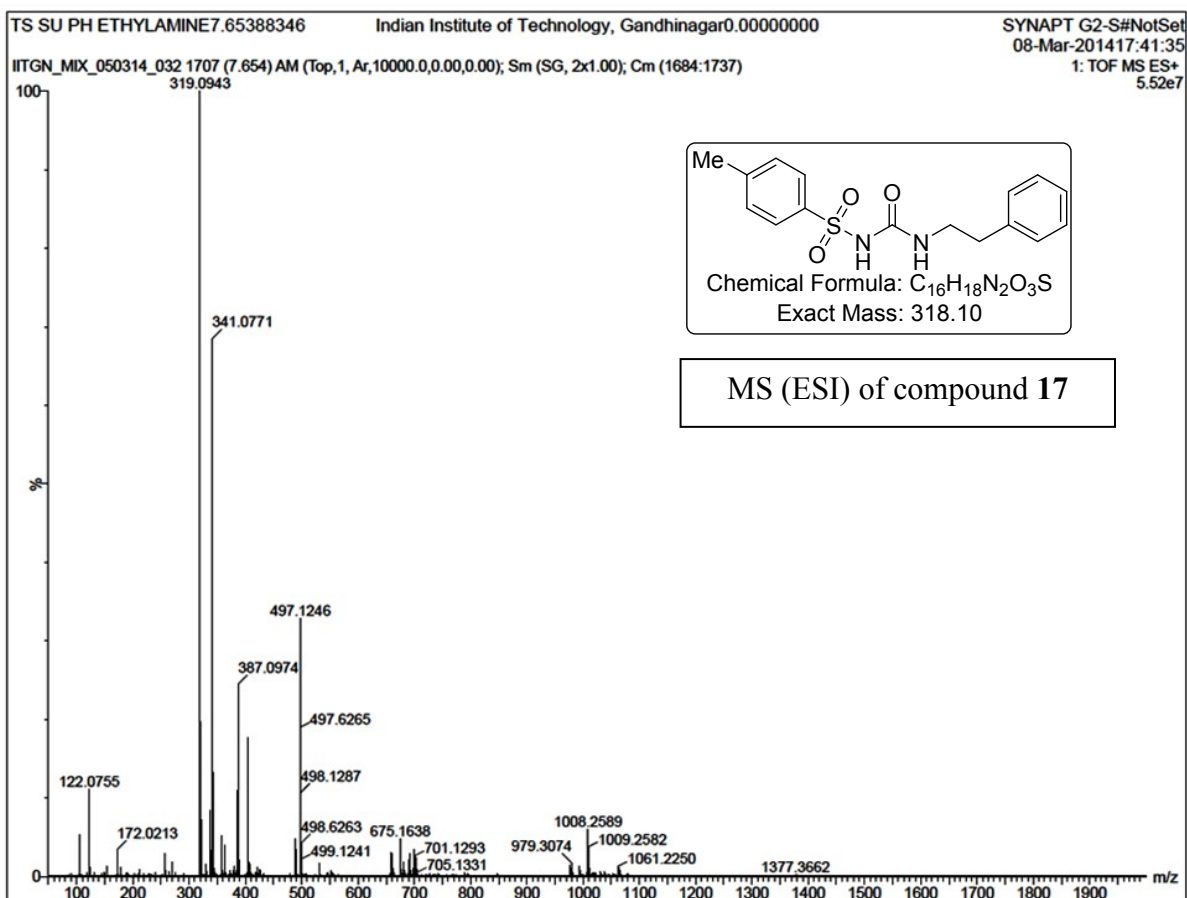

MS (ESI) of compound 17

piperidine su

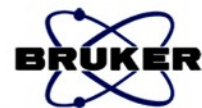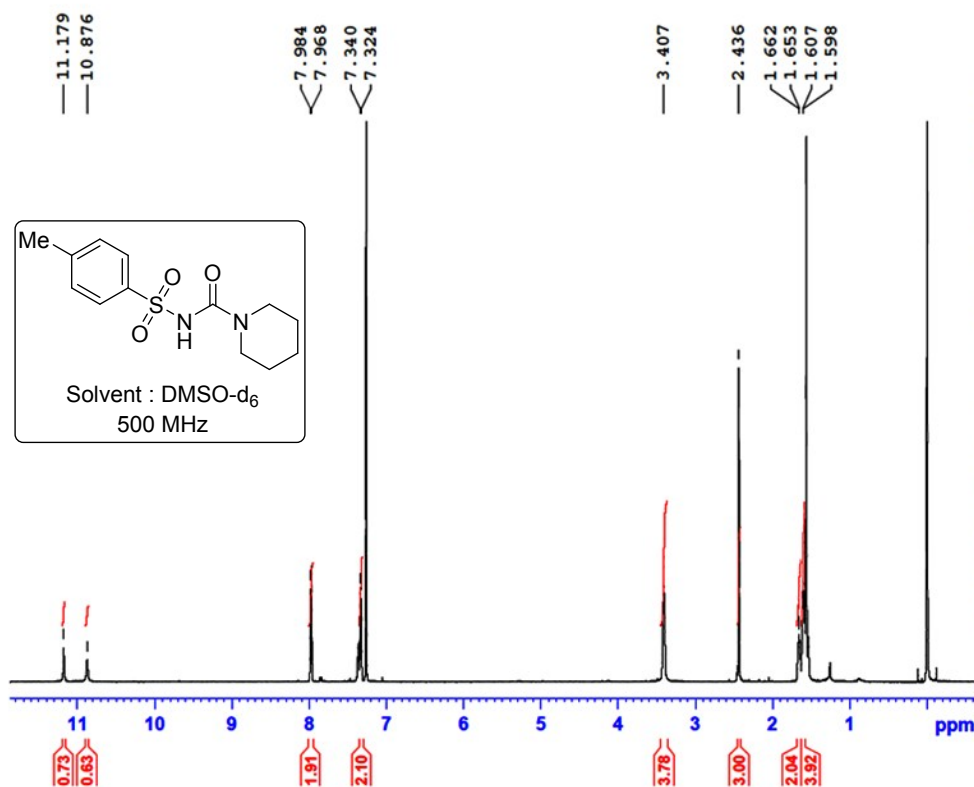

Current Data Parameters  
NAME althaf  
EXPNO 450  
PROCNO 1

F2 - Acquisition Parameters  
Date\_ 20140128  
Time 22.53  
INSTRUM spect  
PROBHD 5 mm PABBO BB/  
PULPROG zg30  
TD 65536  
SOLVENT CDCl3  
NS 32  
DS 2  
SWH 10000.000 Hz  
FIDRES 0.152588 Hz  
AQ 3.2767999 sec  
RG 200.08  
DW 50.000 usec  
DE 6.50 usec  
TE 297.9 K  
D1 1.00000000 sec  
TDO 1

----- CHANNEL f1 -----  
SF01 500.0930883 MHz  
NUC1 1H  
P1 12.15 usec  
PLW1 17.00000000 W

F2 - Processing parameters  
SI 65536  
SF 500.0900145 MHz  
WDW EM  
SSB 0  
LB 0.30 Hz  
GB 0  
PC 1.00

<sup>1</sup>H NMR of compound 18

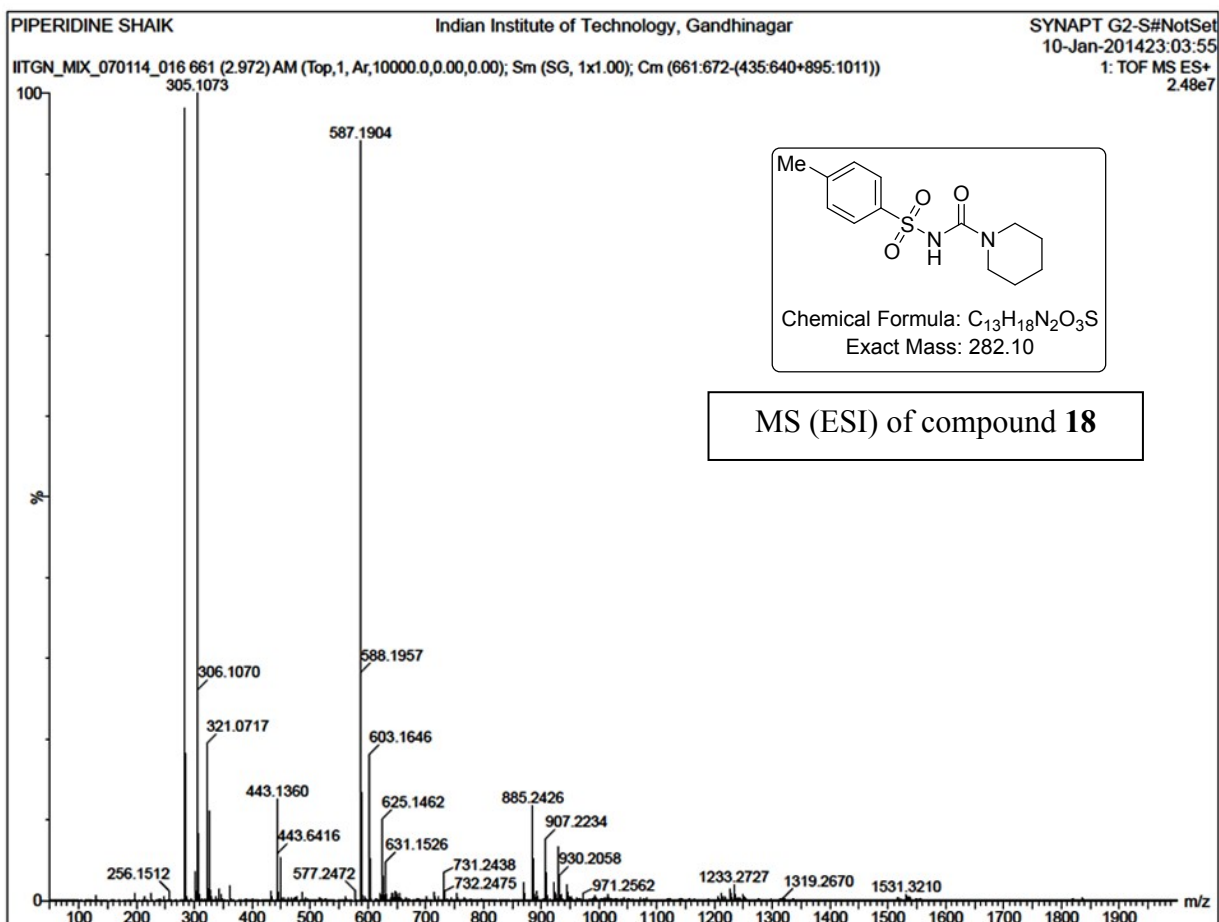

**Table S1**

Docking score and predicted binding energy for compound **1** and design 1-3.

| Molecule          | Docking Score | Predicted binding energy |
|-------------------|---------------|--------------------------|
| Compound <b>1</b> | -8.8          | -55.47                   |
| Design 1          | -7.5          | 12.25                    |
| Design 2          | -7.7          | 9.14                     |
| Design 3          | -4.0          | 0.30                     |

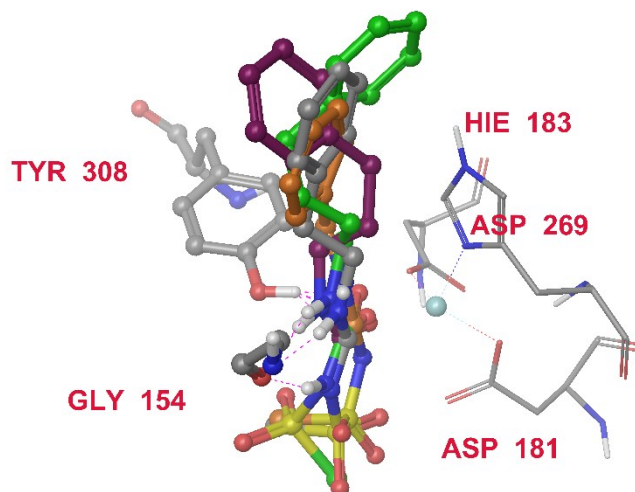

**Fig. S1** Binding mode of compound **1** and design 1,2 and 3 in active site of HDAC2

**Table S2**

Percentage Inhibition of hCA II by compound **1-10** at 10 uM concentration.

| Compound | % Inhibition of hCA II (10 uM) | IC <sub>50</sub> (uM) |
|----------|--------------------------------|-----------------------|
| 1        | 23                             | ND                    |
| 2        | 25                             | ND                    |
| 3        | 26                             | ND                    |

|    |    |    |
|----|----|----|
| 4* | -  | ND |
| 5* | -  | ND |
| 6  | 31 | ND |
| 7  | 30 | ND |
| 8  | 24 | ND |
| 9  | 33 | ND |
| 10 | 27 | ND |

\* Compound not involved in Biological assay  
 ND = Not Determine

**Table S3**

Percentage activation of HDAC1 by compound **11-18** at 10 uM and 100 uM concentration.

| Compound | % Activation of HDAC 1 (10 uM) | % Activation of HDAC 1 (100 uM) |
|----------|--------------------------------|---------------------------------|
| 11       | NA                             | ND                              |
| 12       | 5                              | 13                              |
| 13       | 11                             | 18                              |

|    |    |    |
|----|----|----|
| 14 | NA | ND |
| 15 | NA | ND |
| 16 | NA | ND |
| 17 | NA | ND |
| 18 | NA | ND |

NA= Not Active  
 ND= Not Determine

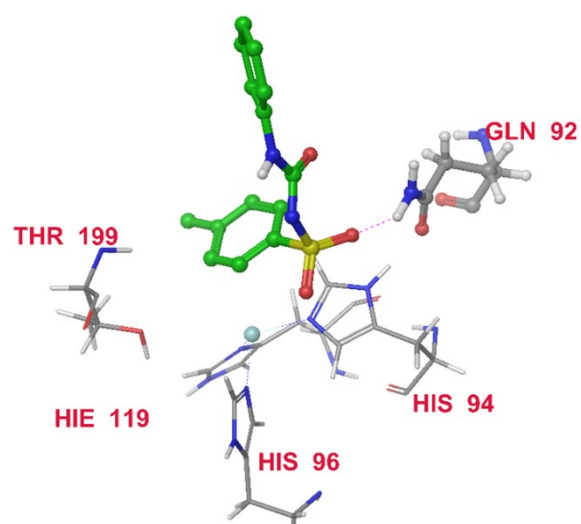

Fig. S2 Binding mode of compound **13** in active site of hCAII

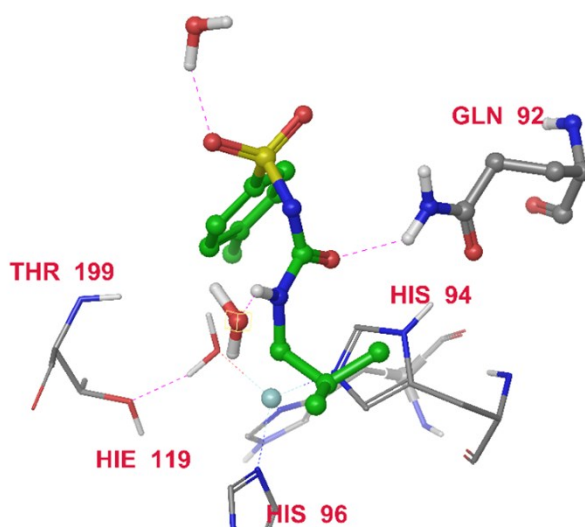

Fig. S3 Binding mode of compound **15** in active site of hCAII



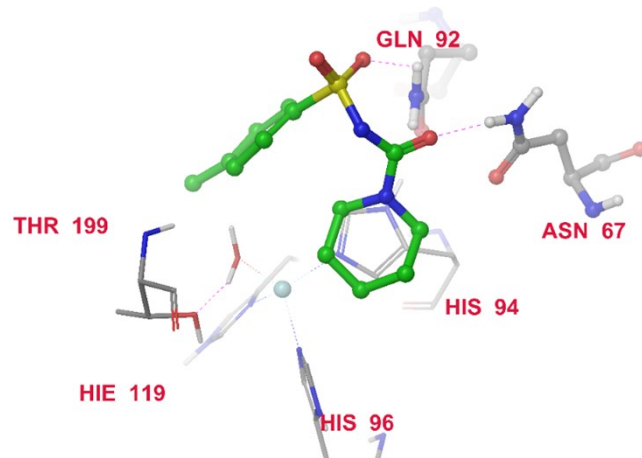

**Fig. S4** Binding mode of compound **18** in active site of hCAII
